# Supplementary material for: Mutations in CHMP2B in Lower Motor Neuron Predominant Amyotrophic Lateral Sclerosis (ALS)
Source: PLoS One. 2010 Mar 24;5(3):e9872. doi: 10.1371/journal.pone.0009872 (PMC2844426; doi:10.1371/journal.pone.0009872)
Supplement: Table S1 — The 891 genes downregulated and 561 genes upregulated in motor neurons with CHMP2B mutations, grouped into biological processes. (0.23 MB XLS) [file pone.0009872.s001.xls]

## Sheet: Sheet1
Probe Set ID	Gene Symbol	Gene Title	Fold Change
Apoptosis
209165_at	AATF	apoptosis antagonizing transcription factor	-2.85
209364_at	BAD	BCL2-antagonist of cell death	-3.29
202387_at	BAG1	BCL2-associated athanogene	-2.11
212312_at	BCL2L1	BCL2-like 1	-2.37
208791_at	CLU	clusterin	-4.2
204577_s_at	CLUAP1	clusterin associated protein 1	-3.18
241854_at	DNASE1	deoxyribonuclease I	-4.07
203277_at	DFFA	DNA fragmentation factor, 45kDa, alpha polypeptide	-2.54
219833_s_at	EFHC1	EF-hand domain (C-terminal) containing 1	-2.78
203089_s_at	HTRA2	HtrA serine peptidase 2	-4.44
217744_s_at	PERP	PERP, TP53 apoptosis effector	-5.21
217965_s_at	SAP30BP	SAP30 binding protein	-2.76
201085_s_at	SON	SON DNA binding protein	-2.69
212121_at	TCTN3	tectonic family member 3	-2.16
216520_s_at	TPT1	tumor protein, translationally-controlled 1	-3.65
201244_s_at	RAF1	v-raf-1 murine leukemia viral oncogene homolog 1	-2.1
207075_at	NLRP3	NLR family, pyrin domain containing 3	2.98
220403_s_at	P53AIP1	p53-regulated apoptosis-inducing protein 1	3.3
214237_x_at	PAWR	PRKC, apoptosis, WT1, regulator	2.5
222380_s_at	PDCD6	programmed cell death 6	2.91
213829_x_at	RTEL1	regulator of telomere elongation helicase 1	2.14
236288_at	RNF34	ring finger protein 34	3.13
222030_at	SIVA1	SIVA1, apoptosis-inducing factor	2.16
1729_at	TRADD	TNFRSF1A-associated via death domain	2.35
221085_at	TNFSF15	tumor necrosis factor (ligand) superfamily, member 15	5.78
Cell adhesion
204482_at	CLDN5	claudin 5 (transmembrane protein deleted in velocardiofacial syndrome)	-7.42
202104_s_at	SPG7	spastic paraplegia 7 (pure and complicated autosomal recessive)	-5.07
213451_x_at	TNXB	tenascin XB	-5.07
201350_at	FLOT2	flotillin 2	-4.89
203088_at	FBLN5	fibulin 5	-4.52
201787_at	FBLN1	fibulin 1	-4.18
229799_s_at	NCAM1	neural cell adhesion molecule 1	-4.11
204949_at	ICAM3	intercellular adhesion molecule 3	-3.88
216840_s_at	LAMA2	laminin, alpha 2 (merosin, congenital muscular dystrophy)	-3.86
211651_s_at	LAMB1	laminin, beta 1	-3.81
209101_at	CTGF	connective tissue growth factor	-3.8
210844_x_at	CTNNA1	catenin (cadherin-associated protein), alpha 1, 102kDa	-3.6
215277_at	PCDH1	protocadherin 1	-3.49
201561_s_at	CLSTN1	calsyntenin 1	-3.48
207782_s_at	PSEN1	presenilin 1 (Alzheimer disease 3)	-3.39
211343_s_at	COL13A1	collagen, type XIII, alpha 1	-3.37
221526_x_at	PARD3	par-3 partitioning defective 3 homolog (C. elegans)	-3.36
209086_x_at	MCAM	melanoma cell adhesion molecule	-3.25
209356_x_at	EFEMP2	EGF-containing fibulin-like extracellular matrix protein 2	-3.18
201234_at	ILK	integrin-linked kinase	-3.14
211677_x_at	CADM3	cell adhesion molecule 3	-2.98
218064_s_at	AKAP8L	A kinase (PRKA) anchor protein 8-like	-2.93
212488_at	COL5A1	collagen, type V, alpha 1	-2.9
221729_at	COL5A2	collagen, type V, alpha 2	-2.88
219726_at	NLGN3	neuroligin 3	-2.57
203735_x_at	PPFIBP1	PTPRF interacting protein, binding protein 1 (liprin beta 1)	-2.47
211700_s_at	TRO	trophinin	-2.44
243645_at	NFASC	neurofascin homolog (chicken)	-2.39
227297_at	ITGA9	integrin, alpha 9	-2.37
211980_at	COL4A1	collagen, type IV, alpha 1	-2.32
209543_s_at	CD34	CD34 molecule	-2.3
214212_x_at	PLEKHC1	pleckstrin homology domain containing, family C (with FERM domain) member 1	-2.29
209436_at	SPON1	spondin 1, extracellular matrix protein	-2.07
224252_s_at	FXYD5	FXYD domain containing ion transport regulator 5	-2.04
208227_x_at	ADAM22	ADAM metallopeptidase domain 22	2.11
209835_x_at	CD44	CD44 molecule (Indian blood group)	5.12
204726_at	CDH13	cadherin 13, H-cadherin (heart)	5.66
206327_s_at	CDH15	cadherin 15, M-cadherin (myotubule)	3.89
214598_at	CLDN8	claudin 8	5
232733_s_at	COL20A1	collagen, type XX, alpha 1	2.36
224097_s_at	F11R	F11 receptor	2.07
222020_s_at	HNT	neurotrimin	2.25
1554819_a_at	ITGA11	integrin, alpha 11	2.27
206215_at	OPCML	opioid binding protein/cell adhesion molecule-like	2.21
1555019_at	PCDH21	protocadherin 21	2.79
240317_at	PCDHB4	protocadherin beta 4	2
211807_x_at	PCDHGB5	protocadherin gamma subfamily B, 5	4.06
1568574_x_at	SPP1	secreted phosphoprotein 1	3.86
224543_at	SVEP1	sushi, von Willebrand factor type A, EGF and pentraxin domain containing 1	2.5
1557261_at	WHDC1L1	WAS protein homology region 2 domain containing 1-like 1	3.55
Cell cycle
217728_at	S100A6	S100 calcium binding protein A6	-4.42
201115_at	POLD2	polymerase (DNA directed), delta 2, regulatory subunit 50kDa	-4.03
207266_x_at	RBMS1	RNA binding motif, single stranded interacting protein 1	-3.21
223159_s_at	NEK6	NIMA (never in mitosis gene a)-related kinase 6	-3.1
202487_s_at	H2AFV	H2A histone family, member V	-4.09
214554_at	HIST1H2AK	histone cluster 1, H2ak	-4.09
205436_s_at	H2AFX	H2A histone family, member X	-2.98
211997_x_at	H3F3B	H3 histone, family 3B (H3.3B)	-2.92
204805_s_at	H1FX	H1 histone family, member X	-2.81
214501_s_at	H2AFY	H2A histone family, member Y	-2.71
208026_at	HIST1H4F	histone cluster 1, H4f	-2.52
205547_s_at	TAGLN	transgelin	-6.61
208711_s_at	CCND1	cyclin D1	-5.88
208657_s_at	2009-09-01	septin 9	-5.6
203114_at	SSSCA1	Sjogren syndrome/scleroderma autoantigen 1	-5.29
217881_s_at	CDC27	cell division cycle 27 homolog (S. cerevisiae)	-5.1
202587_s_at	AK1	adenylate kinase 1	-4.44
1554690_a_at	TACC1	transforming, acidic coiled-coil containing protein 1	-4.05
209920_at	BMPR2	bone morphogenetic protein receptor, type II (serine/threonine kinase)	-3.56
208722_s_at	ANAPC5	anaphase promoting complex subunit 5	-3.53
204346_s_at	RASSF1	Ras association (RalGDS/AF-6) domain family 1	-3.4
209729_at	GAS2L1	growth arrest-specific 2 like 1	-3.39
1555411_a_at	CCNL1	cyclin L1	-3.29
201970_s_at	NASP	nuclear autoantigenic sperm protein (histone-binding)	-3.27
201621_at	NBL1	neuroblastoma, suppression of tumorigenicity 1	-3.15
201394_s_at	RBM5	RNA binding motif protein 5	-3.08
201912_s_at	GSPT1	G1 to S phase transition 1	-3.06
204958_at	PLK3	polo-like kinase 3 (Drosophila)	-3.04
204080_at	TOE1	target of EGR1, member 1 (nuclear)	-2.99
212983_at	HRAS	v-Ha-ras Harvey rat sarcoma viral oncogene homolog	-2.71
201202_at	PCNA	proliferating cell nuclear antigen	-2.68
210574_s_at	NUDC	nuclear distribution gene C homolog (A. nidulans)	-2.65
208655_at	CCNI	cyclin I	-2.59
203526_s_at	APC	adenomatosis polyposis coli	-2.58
212096_s_at	MTUS1	mitochondrial tumor suppressor 1	-2.58
202177_at	GAS6	growth arrest-specific 6	-2.51
208967_s_at	AK2	adenylate kinase 2	-2.48
207574_s_at	GADD45B	growth arrest and DNA-damage-inducible, beta	-2.44
208415_x_at	ING1	inhibitor of growth family, member 1	-2.32
223519_at	ZAK	sterile alpha motif and leucine zipper containing kinase AZK	-2.32
205899_at	CCNA1	cyclin A1	-2.24
226436_at	RASSF4	Ras association (RalGDS/AF-6) domain family 4	-2.23
210657_s_at	SEPT4	septin 4	-2.22
211080_s_at	NEK2	NIMA (never in mitosis gene a)-related kinase 2	-2.19
204784_s_at	MLF1	myeloid leukemia factor 1	-2.18
231198_at	CDK6	cyclin-dependent kinase 6	-2.15
205449_at	SAC3D1	SAC3 domain containing 1	-2.13
202717_s_at	CDC16	cell division cycle 16 homolog (S. cerevisiae)	-2.12
227896_at	BCCIP	BRCA2 and CDKN1A interacting protein	-2.11
237162_at	ANKRD15	ankyrin repeat domain 15	5.59
205865_at	ARID3A	AT rich interactive domain 3A (BRIGHT-like)	3.91
225531_at	CABLES1	Cdk5 and Abl enzyme substrate 1	2.28
229091_s_at	CCNJ	cyclin J	2.65
223513_at	CENPJ	centromere protein J	2.03
235478_at	DCLRE1C	DNA cross-link repair 1C (PSO2 homolog, S. cerevisiae)	3.05
203729_at	EMP3	epithelial membrane protein 3	2.16
235588_at	ESCO2	establishment of cohesion 1 homolog 2 (S. cerevisiae)	2.57
240452_at	GSPT1	G1 to S phase transition 1	5.75
205385_at	MDM2	Mdm2, transformed 3T3 cell double minute 2, p53 binding protein	4.08
212020_s_at	MKI67	antigen identified by monoclonal antibody Ki-67	2.17
205235_s_at	MPHOSPH1	M-phase phosphoprotein 1	2.19
204641_at	NEK2	NIMA (never in mitosis gene a)-related kinase 2	14.5
1554659_at	NEK4	NIMA (never in mitosis gene a)-related kinase 4	2.16
228669_x_at	PARP10	poly (ADP-ribose) polymerase family, member 10	3.08
202730_s_at	PDCD4	programmed cell death 4 (neoplastic transformation inhibitor)	2.01
243761_at	PFTK1	PFTAIRE protein kinase 1	3.09
206499_s_at	RCC1	regulator of chromosome condensation 1	2.21
1558115_at	RECK	eversion-inducing-cysteine-rich protein with kazal motifs	2.29
232379_at	SKIL	SKI-like oncogene	2.88
227945_at	TBC1D1	TBC1 (tre-2/USP6, BUB2, cdc16) domain family, member 1	2.59
220961_s_at	TBRG4	transforming growth factor beta regulator 4	2.91
1555271_a_at	TERT	telomerase reverse transcriptase	2.61
219478_at	WFDC1	WAP four-disulfide core domain 1	3.49
Cell motility
202109_at	ARFIP2	ADP-ribosylation factor interacting protein 2 (arfaptin 2)	-2.71
208977_x_at	TUBB2C	tubulin, beta 2C	-5.18
209026_x_at	TUBB	tubulin, beta	-4.87
213646_x_at	TUBA1B	tubulin, alpha 1b	-4.48
202154_x_at	TUBB3	tubulin, beta 3	-4.13
211750_x_at	TUBA1C	tubulin, alpha 1c	-3.94
216323_x_at	TUBA3D	tubulin, alpha 3d	-3.33
209191_at	TUBB6	tubulin, beta 6	-2.9
207490_at	TUBA4B	tubulin, alpha 4b (pseudogene)	-2.51
201616_s_at	CALD1	caldesmon 1	-4.05
216700_at	TRIO	triple functional domain (PTPRF interacting)	2.11
Cytoskeleton
212647_at	RRAS	related RAS viral (r-ras) oncogene homolog	-4.96
218223_s_at	PLEKHO1	pleckstrin homology domain containing, family O member 1	-4.86
203254_s_at	TLN1	talin 1	-4.01
230803_s_at	ARHGAP24	Rho GTPase activating protein 24	-3.9
202174_s_at	PCM1	pericentriolar material 1	-3.62
211995_x_at	ACTG1	actin, gamma 1	-3.36
208633_s_at	MACF1	microtubule-actin crosslinking factor 1	-3.16
212567_s_at	MAP4	microtubule-associated protein 4	-3.09
208637_x_at	ACTN1	actinin, alpha 1	-3.08
34206_at	CENTD2	centaurin, delta 2	-3.04
218522_s_at	MAP1S	microtubule-associated protein 1S	-2.83
210987_x_at	TPM1	tropomyosin 1 (alpha)	-2.74
209447_at	SYNE1	spectrin repeat containing, nuclear envelope 1	-2.71
217733_s_at	TMSB10	thymosin, beta 10	-2.52
226576_at	ARHGAP26	Rho GTPase activating protein 26	-2.39
202123_s_at	ABL1	abelson murine leukemia viral (v-abl) oncogene homolog 1	-2.21
213023_at	UTRN	utrophin	-2.2
214736_s_at	ADD1	adducin 1 (alpha)	-2.08
221779_at	MICALL1	MICAL-like 1	-2.08
200859_x_at	FLNA	filamin A, alpha (actin binding protein 280)	-2.07
204797_s_at	EML1	echinoderm microtubule associated protein like 1	-2.01
202760_s_at	AKAP2	A kinase (PRKA) anchor protein 2	-2.01
202440_s_at	ST5	suppression of tumorigenicity 5	-2
235412_at	ARHGEF7	Rho guanine nucleotide exchange factor (GEF) 7	4.37
231881_at	CALD1	caldesmon 1	4.62
1552689_at	CASKIN1	CASK interacting protein 1	2.29
207209_at	CETN1	centrin, EF-hand protein, 1	2.27
236533_at	DDEF1	development and differentiation enhancing factor 1	2.42
220524_at	EPB41L4B	erythrocyte membrane protein band 4.1 like 4B	5.93
230086_at	FNBP1	formin binding protein 1	3.89
235114_x_at	HOOK3	hook homolog 3 (Drosophila)	2.24
1555862_s_at	MICALL2	MICAL-like 2	5
1557535_at	PALLD	palladin, cytoskeletal associated protein	2.02
211751_at	PDE4DIP	phosphodiesterase 4D interacting protein (myomegalin)	2.62
214122_at	PDLIM7	PDZ and LIM domain 7 (enigma)	4.52
228171_s_at	PLEKHG4	pleckstrin homology domain containing, family G (with RhoGef domain) member 4	2.36
1556030_at	SMTN	smoothelin	3.07
213914_s_at	SPTBN1	spectrin, beta, non-erythrocytic 1	2.56
235128_at	SYNPO	synaptopodin	2.66
1562619_at	TXNDC6	thioredoxin domain containing 6	4.06
Development
211136_s_at	CLPTM1	cleft lip and palate associated transmembrane protein 1	-6.08
218584_at	TECT1	tectonic 1	-4.45
204249_s_at	LMO2	LIM domain only 2 (rhombotin-like 1)	-3.05
1552730_at	DHH	desert hedgehog homolog (Drosophila)	-2.75
219049_at	ChGn	chondroitin beta1,4 N-acetylgalactosaminyltransferase	-2.64
221884_at	EVI1	ecotropic viral integration site 1	-2.29
202551_s_at	CRIM1	cysteine rich transmembrane BMP regulator 1 (chordin-like)	-2.19
231778_at	DLX3	distal-less homeobox 3	-2.06
208212_s_at	ALK	anaplastic lymphoma kinase (Ki-1)	2.45
213965_s_at	CHD5	chromodomain helicase DNA binding protein 5	4.09
228906_at	CXXC6	CXXC finger 6	2.61
222070_at	DND1	dead end homolog 1 (zebrafish)	2.36
208469_s_at	EGFL8	EGF-like-domain, multiple 8	3.48
230288_at	FGF14	fibroblast growth factor 14	2.01
1555471_a_at	FMN2	formin 2	2.07
229400_at	HOXD10	homeobox D10	5.83
244572_at	KY	kyphoscoliosis peptidase	2.22
206230_at	LHX1	LIM homeobox 1	3.95
1555099_at	MPP4	membrane protein, palmitoylated 4 (MAGUK p55 subfamily member 4)	2.65
218657_at	RAPGEFL1	Rap guanine nucleotide exchange factor (GEF)-like 1	3.6
234098_at	SOBP	sine oculis binding protein homolog (Drosophila)	11.6
Immune response
222915_s_at	BANK1	B-cell scaffold protein with ankyrin repeats 1	-3.21
208651_x_at	CD24	CD24 molecule	-4.05
201462_at	SCRN1	secernin 1	-3.55
204158_s_at	TCIRG1	T-cell, immune regulator 1, ATPase, H+ transporting, lysosomal V0 subunit A3	-5.12
211799_x_at	HLA-C	major histocompatibility complex, class I, C	-8.1
202411_at	IFI27	interferon, alpha-inducible protein 27	-6.34
202357_s_at	CFB	complement factor B	-6.22
209140_x_at	HLA-B	major histocompatibility complex, class I, B	-6.16
200675_at	CD81	CD81 molecule	-4.4
215388_s_at	CFH	complement factor H	-3.96
218529_at	CD320	CD320 molecule	-3.85
201028_s_at	CD99	CD99 molecule	-3.59
210233_at	IL1RAP	interleukin 1 receptor accessory protein	-3.07
202380_s_at	NKTR	natural killer-tumor recognition sequence	-3.06
211528_x_at	HLA-G	HLA-G histocompatibility antigen, class I, G	-3
217871_s_at	MIF	macrophage migration inhibitory factor (glycosylation-inhibiting factor)	-2.99
202145_at	LY6E	lymphocyte antigen 6 complex, locus E	-2.28
223032_x_at	PRELID1	PRELI domain containing 1	-2.03
208090_s_at	AIRE	autoimmune regulator	3.04
207354_at	CCL16	chemokine (C-C motif) ligand 16	2.31
206337_at	CCR7	chemokine (C-C motif) receptor 7	2.6
38521_at	CD22	CD22 molecule	2.08
205033_s_at	DEFA1	defensin, alpha 1	2.52
210397_at	DEFB1	defensin, beta 1	2.65
224239_at	DEFB103B	defensin, beta 103B	2.03
1552411_at	DEFB106A	defensin, beta 106A	2.54
1561165_a_at	DEFB108B	defensin, beta 108B	3.58
1563674_at	FCRL2	Fc receptor-like 2	8.32
224406_s_at	FCRL5	Fc receptor-like 5	2.93
217145_at	IGKC	immunoglobulin kappa constant	5.15
208200_at	IL1A	interleukin 1, alpha	2.33
220663_at	IL1RAPL1	interleukin 1 receptor accessory protein-like 1	2.03
220056_at	IL22RA1	interleukin 22 receptor, alpha 1	2.29
208179_x_at	KIR2DL3	killer cell immunoglobulin-like receptor, two domains, long cytoplasmic tail, 3	3.03
207313_x_at	KIR3DL2	killer cell immunoglobulin-like receptor, three domains, long cytoplasmic tail, 2	2.94
206773_at	LY6H	lymphocyte antigen 6 complex, locus H	3.67
217418_x_at	MS4A1	membrane-spanning 4-domains, subfamily A, member 1	2.7
243099_at	NFAM1	NFAT activating protein with ITAM motif 1	2.48
212808_at	NFATC2IP	nuclear factor of activated T-cells, cytoplasmic, calcineurin-dependent 2 interacting protein	3.79
225626_at	PAG1	phosphoprotein associated with glycosphingolipid microdomains 1	2.03
1554994_at	RAG1	recombination activating gene 1	4.32
210116_at	SH2D1A	SH2 domain protein 1A	3.43
241331_at	SKAP2	src kinase associated phosphoprotein 2	5.37
223751_x_at	TLR10	toll-like receptor 10	3.29
1552892_at	TNFRSF13C	tumor necrosis factor receptor superfamily, member 13C	3.84
223501_at	TNFSF13B	tumor necrosis factor (ligand) superfamily, member 13b	3.27
240766_at	TRBC1	T cell receptor beta constant 1	3.27
Ion transport
211592_s_at	CACNA1C	calcium channel, voltage-dependent, L type, alpha 1C subunit	-3.32
229251_s_at	TPCN2	two pore segment channel 2	-2.41
217515_s_at	CACNA1S	calcium channel, voltage-dependent, L type, alpha 1S subunit	-2.33
218608_at	ATP13A2	ATPase type 13A2	-5.79
203295_s_at	ATP1A2	ATPase, Na+/K+ transporting, alpha 2 (+) polypeptide	-3.54
1553567_s_at	ATP13A5	ATPase type 13A5	-2.95
205513_at	TCN1	transcobalamin I (vitamin B12 binding protein, R binder family)	-2.31
205241_at	SCO2	SCO cytochrome oxidase deficient homolog 2 (yeast)	-4.64
210215_at	TFR2	transferrin receptor 2	-2.6
217226_s_at	SFXN3	sideroflexin 3	-2.2
219952_s_at	MCOLN1	mucolipin 1	-2.57
218569_s_at	KBTBD4	kelch repeat and BTB (POZ) domain containing 4	-3.35
34858_at	KCTD2	potassium channel tetramerisation domain containing 2	-3.09
223206_s_at	NMRAL1	NmrA-like family domain containing 1	-3.06
1552761_at	SLC16A11	solute carrier family 16, member 11 (monocarboxylic acid transporter 11)	-3.58
201527_at	ATP6V1F	ATPase, H+ transporting, lysosomal 14kDa, V1 subunit F	-2.17
205081_at	CRIP1	cysteine-rich protein 1 (intestinal)	-4.89
211992_at	WNK1	WNK lysine deficient protein kinase 1	-4.01
204846_at	CP	ceruloplasmin (ferroxidase)	-2.81
237070_at	TRPM1	transient receptor potential cation channel, subfamily M, member 1	-2.71
1557374_at	ABCC9	ATP-binding cassette, sub-family C (CFTR/MRP), member 9	2.93
224520_s_at	BEST3	bestrophin 3	4.4
211802_x_at	CACNA1G	calcium channel, voltage-dependent, T type, alpha 1G subunit	2.14
221881_s_at	CLIC4	chloride intracellular channel 4	3.9
218900_at	CNNM4	cyclin M4	2.19
204644_at	ENOX2	ecto-NOX disulfide-thiol exchanger 2	3.47
214595_at	KCNG1	potassium voltage-gated channel, subfamily G, member 1	2.2
220519_s_at	LIM2	lens intrinsic membrane protein 2, 19kDa	4.75
1555465_at	MCOLN2	mucolipin 2	2.16
210401_at	P2RX1	purinergic receptor P2X, ligand-gated ion channel, 1	2.21
210853_at	SCN11A	sodium channel, voltage-gated, type XI, alpha subunit	5.45
232512_at	SCN3A	sodium channel, voltage-gated, type III, alpha subunit	3.3
205317_s_at	SLC15A2	solute carrier family 15 (H+/peptide transporter), member 2	2.3
206599_at	SLC16A5	solute carrier family 16, member 5 (monocarboxylic acid transporter 6)	2.43
241866_at	SLC16A7	solute carrier family 16, member 7 (monocarboxylic acid transporter 2)	2.8
204229_at	SLC17A7	solute carrier family 17 (sodium-dependent inorganic phosphate cotransporter), member 7	2.12
230494_at	SLC20A1	solute carrier family 20 (phosphate transporter), member 1	3.27
221106_at	SLC22A17	solute carrier family 22, member 17	2.39
215657_at	SLC26A3	solute carrier family 26, member 3	8.76
207249_s_at	SLC28A2	solute carrier family 28 (sodium-coupled nucleoside transporter), member 2	7.13
216504_s_at	SLC39A8	solute carrier family 39 (zinc transporter), member 8	2.61
216011_at	SLC39A9	solute carrier family 39 (zinc transporter), member 9	2.17
228935_at	SLC4A8	solute carrier family 4, sodium bicarbonate cotransporter, member 8	2.48
235518_at	SLC8A1	solute carrier family 8 (sodium/calcium exchanger), member 1	3.21
222071_s_at	SLCO4C1	solute carrier organic anion transporter family, member 4C1	3.31
215863_at	TFR2	transferrin receptor 2	3.62
215269_at	TMEM1	transmembrane protein 1	4.76
231978_at	TPCN2	two pore segment channel 2	8.09
208349_at	TRPA1	transient receptor potential cation channel, subfamily A, member 1	2.43
Kinases / Phosphatases
201805_at	PRKAG1	protein kinase, AMP-activated, gamma 1 non-catalytic subunit	-5.07
212775_at	OBSL1	obscurin-like 1	-4.65
203709_at	PHKG2	phosphorylase kinase, gamma 2 (testis)	-4.34
202178_at	PRKCZ	protein kinase C, zeta	-4.23
213045_at	MAST3	microtubule associated serine/threonine kinase 3	-3.65
1554808_at	ACP1	acid phosphatase 1, soluble	-3.62
202140_s_at	CLK3	CDC-like kinase 3	-3.57
209333_at	ULK1	unc-51-like kinase 1 (C. elegans)	-3.48
206070_s_at	EPHA3	EPH receptor A3	-3.31
212559_at	PRKAR1B	protein kinase, cAMP-dependent, regulatory, type I, beta	-3.28
223207_x_at	PHPT1	phosphohistidine phosphatase 1	-3.22
223686_at	TPK1	thiamin pyrophosphokinase 1	-3.19
218764_at	PRKCH	protein kinase C, eta	-2.81
232353_s_at	STYXL1	serine/threonine/tyrosine interacting-like 1	-2.4
201041_s_at	DUSP1	dual specificity phosphatase 1	-2.17
232282_at	WNK3	WNK lysine deficient protein kinase 3	-2.13
213010_at	PRKCDBP	protein kinase C, delta binding protein	-2.12
201375_s_at	PPP2CB	protein phosphatase 2 (formerly 2A), catalytic subunit, beta isoform	-2.11
216105_x_at	PPP2R4	protein phosphatase 2A activator, regulatory subunit 4	-2.03
1561190_at	CDKL3	cyclin-dependent kinase-like 3	3.14
216837_at	EPHA5	EPH receptor A5	2.35
224307_x_at	MAGI3	membrane associated guanylate kinase, WW and PDZ domain containing 3	2.3
243575_at	MAST4	microtubule associated serine/threonine kinase family member 4	2.85
206060_s_at	PTPN22	protein tyrosine phosphatase, non-receptor type 22 (lymphoid)	3.78
1557145_at	STK38	serine/threonine kinase 38	3.01
224321_at	TMEFF2	transmembrane protein with EGF-like and two follistatin-like domains 2	25.1
230989_s_at	TSSK6	testis-specific serine kinase 6	2.03
Metabolism
216381_x_at	AKR7A3	aldo-keto reductase family 7, member A3 (aflatoxin aldehyde reductase)	-2
215024_at	ASNS	asparagine synthetase	-3.37
205978_at	KL	klotho	-4.22
206258_at	ST8SIA5	ST8 alpha-N-acetyl-neuraminide alpha-2,8-sialyltransferase 5	-3.98
217973_at	DCXR	dicarbonyl/L-xylulose reductase	-3.37
223786_at	CHST6	carbohydrate (N-acetylglucosamine 6-O) sulfotransferase 6	-2.96
209993_at	ABCB1	ATP-binding cassette sub-family B member 1	-2.78
218533_s_at	UCKL1	uridine-cytidine kinase 1-like 1	-2.58
200681_at	GLO1	glyoxalase I	-2.32
202721_s_at	GFPT1	glutamine-fructose-6-phosphate transaminase 1	-2.31
201126_s_at	MGAT1	mannosyl(alpha-1,3-)-glycoproteinbeta-1,2-N-acetylglucosaminyltransferase	-2.29
221065_s_at	CHST8	carbohydrate (N-acetylgalactosamine 4-0) sulfotransferase 8	-2.17
1557994_at	TTN	titin	-2.09
209166_s_at	MAN2B1	mannosidase, alpha, class 2B, member 1	-2
200793_s_at	ACO2	aconitase 2, mitochondrial	-4.74
214333_x_at	IDH3G	isocitrate dehydrogenase 3 (NAD+) gamma	-3.92
205354_at	GAMT	guanidinoacetate N-methyltransferase	-2.69
204295_at	SURF1	surfeit 1	-4.25
212472_at	MICAL2	microtubule associated monoxygenase, calponin and LIM domain containing 2	-3.55
238117_at	PPOX	protoporphyrinogen oxidase	-3.53
220432_s_at	CYP39A1	cytochrome P450, family 39, subfamily A, polypeptide 1	-3.24
219862_s_at	NARF	nuclear prelamin A recognition factor	-3.19
201119_s_at	COX8A	cytochrome c oxidase subunit 8A (ubiquitous)	-2.67
204570_at	COX7A1	cytochrome c oxidase subunit VIIa polypeptide 1 (muscle)	-2.44
209975_at	CYP2E1	cytochrome P450, family 2, subfamily E, polypeptide 1	-2.43
208717_at	OXA1L	oxidase (cytochrome c) assembly 1-like	-2.2
200925_at	COX6A1	cytochrome c oxidase subunit VIa polypeptide 1	-2.02
1554574_a_at	CYB5R3	cytochrome b5 reductase 3	-2
218664_at	MECR	mitochondrial trans-2-enoyl-CoA reductase	-2.34
203467_at	PMM1	phosphomannomutase 1	-2.65
201251_at	PKM2	pyruvate kinase, muscle	-3.65
200643_at	HDLBP	high density lipoprotein binding protein (vigilin)	-10.3
202593_s_at	MIR16	membrane interacting protein of RGS16	-4.65
218322_s_at	ACSL5	acyl-CoA synthetase long-chain family member 5	-4.54
202003_s_at	ACAA2	acetyl-Coenzyme A acyltransferase 2	-4.41
212187_x_at	PTGDS	prostaglandin D2 synthase 21kDa (brain)	-4.23
200866_s_at	PSAP	prosaposin (variant Gaucher disease and variant metachromatic leukodystrophy)	-4.09
38241_at	BTN3A3	butyrophilin, subfamily 3, member A3	-3.56
208962_s_at	FADS1	fatty acid desaturase 1	-3.19
208336_s_at	GPSN2	glycoprotein, synaptic 2	-3.09
205127_at	PTGS1	prostaglandin-endoperoxide synthase 1 (prostaglandin G/H synthase and cyclooxygenase)	-3.02
203914_x_at	HPGD	hydroxyprostaglandin dehydrogenase 15-(NAD)	-2.83
215064_at	SC5DL	sterol-C5-desaturase (ERG3 delta-5-desaturase homolog, S. cerevisiae)-like	-2.65
204488_at	DOLK	dolichol kinase	-2.56
218552_at	ECHDC2	enoyl Coenzyme A hydratase domain containing 2	-2.46
207122_x_at	SULT1A2	sulfotransferase family, cytosolic, 1A, phenol-preferring, member 2	-2.36
207485_x_at	BTN3A1	butyrophilin, subfamily 3, member A1	-2.25
204212_at	ACOT8	acyl-CoA thioesterase 8	-2.24
200710_at	ACADVL	acyl-Coenzyme A dehydrogenase, very long chain	-2.2
216080_s_at	FADS3	fatty acid desaturase 3	-2.18
209321_s_at	ADCY3	adenylate cyclase 3	-2.08
213264_at	PCBP2	poly(rC) binding protein 2	-2.88
1553734_at	AK7	adenylate kinase 7	-3.77
213892_s_at	APRT	adenine phosphoribosyltransferase	-2.88
201572_x_at	DCTD	dCMP deaminase	-4.47
217990_at	GMPR2	guanosine monophosphate reductase 2	-3.67
201892_s_at	IMPDH2	IMP (inosine monophosphate) dehydrogenase 2	-2.76
226707_at	NAPRT1	nicotinate phosphoribosyltransferase domain containing 1	-2.74
225304_s_at	NDUFA11	NADH dehydrogenase (ubiquinone) 1 alpha subcomplex, 11, 14.7kDa	-7.75
201903_at	UQCRC1	ubiquinol-cytochrome c reductase core protein I	-6.67
218320_s_at	NDUFB11	NADH dehydrogenase (ubiquinone) 1 beta subcomplex, 11, 17.3kDa	-3.05
222992_s_at	NDUFB9	NADH dehydrogenase (ubiquinone) 1 beta subcomplex, 9, 22kDa	-2.62
223112_s_at	NDUFB10	NADH dehydrogenase (ubiquinone) 1 beta subcomplex, 10, 22kDa	-2.45
203190_at	NDUFS8	NADH dehydrogenase (ubiquinone) Fe-S protein 8, 23kDa (NADH-coenzyme Q reductase)	-2.2
236286_at	PROCA1	proline-rich cyclin A1-interacting protein	-2.66
210720_s_at	APBA2BP	amyloid beta (A4) precursor protein-binding, family A, member 2 binding protein	-3.81
203576_at	BCAT2	branched chain aminotransferase 2, mitochondrial	-2.26
38703_at	DNPEP	aspartyl aminopeptidase	-2.04
210130_s_at	TM7SF2	transmembrane 7 superfamily member 2	-3.98
238996_x_at	ALDOA	aldolase A, fructose-bisphosphate	-6.02
203452_at	B3GAT3	beta-1,3-glucuronyltransferase 3 (glucuronosyltransferase I)	-5.81
202671_s_at	PDXK	pyridoxal (pyridoxine, vitamin B6) kinase	-3.36
217949_s_at	VKORC1	vitamin K epoxide reductase complex, subunit 1	-3.46
203669_s_at	DGAT1	diacylglycerol O-acyltransferase homolog 1 (mouse)	-6.09
202929_s_at	DDT	D-dopachrome tautomerase	-4.7
208308_s_at	GPI	glucose phosphate isomerase	-4.03
217751_at	GSTK1	glutathione S-transferase kappa 1	-3.9
211922_s_at	CAT	catalase	-3.74
209512_at	HSDL2	hydroxysteroid dehydrogenase like 2	-3.68
200075_s_at	GUK1	guanylate kinase 1	-3.5
208700_s_at	TKT	transketolase (Wernicke-Korsakoff syndrome)	-3.21
203128_at	SPTLC2	serine palmitoyltransferase, long chain base subunit 2	-2.78
221679_s_at	ABHD6	abhydrolase domain containing 6	-2.57
221435_x_at	HYI	hydroxypyruvate isomerase homolog (E. coli)	-2.49
223692_at	NMNAT1	nicotinamide nucleotide adenylyltransferase 1	-2.25
218328_at	COQ4	coenzyme Q4 homolog (S. cerevisiae)	-2.23
216308_x_at	GRHPR	glyoxylate reductase/hydroxypyruvate reductase	-2.15
212228_s_at	COQ9	coenzyme Q9 homolog (S. cerevisiae)	-2.13
1570505_at	ABCB4	ATP-binding cassette, sub-family B (MDR/TAP), member 4	4.44
213805_at	ABHD5	abhydrolase domain containing 5	2.95
204242_s_at	ACOX3	acyl-Coenzyme A oxidase 3, pristanoyl	2.3
241978_at	AKR1A1	aldo-keto reductase family 1, member A1 (aldehyde reductase)	2.24
220148_at	ALDH8A1	aldehyde dehydrogenase 8 family, member A1	2.41
206738_at	APOC4	apolipoprotein C-IV	2.92
212883_at	APOE	apolipoprotein E	4.95
210603_at	ARD1B	ARD1 homolog B (S. cerevisiae)	2.63
215654_at	BCAT2	branched chain aminotransferase 2, mitochondrial	2.12
233630_at	CDS2	CDP-diacylglycerol synthase (phosphatidate cytidylyltransferase) 2	4.38
240863_at	CYP19A1	cytochrome P450, family 19, subfamily A, polypeptide 1	3.72
206754_s_at	CYP2B7P1	cytochrome P450, family 2, subfamily B, polypeptide 7 pseudogene 1	3.42
210726_at	CYP3A4	cytochrome P450, family 3, subfamily A, polypeptide 4	3.37
205939_at	CYP3A7	cytochrome P450, family 3, subfamily A, polypeptide 7	2.14
238053_at	DHRSX	dehydrogenase/reductase (SDR family) X-linked	2.12
210080_x_at	ELA3A	elastase 3A, pancreatic	4.84
244044_at	ENPP3	ectonucleotide pyrophosphatase/phosphodiesterase 3	2.57
205776_at	FMO5	flavin containing monooxygenase 5	2.45
217167_x_at	GK	glycerol kinase	2.71
1553772_at	GK5	glycerol kinase 5 (putative)	3.64
223079_s_at	GLS	glutaminase	2.92
205770_at	GSR	glutathione reductase	2.2
213621_s_at	GUK1	guanylate kinase 1	2.3
210963_s_at	GYG2	glycogenin 2	2.13
238832_at	KLHL34	kelch-like 34 (Drosophila)	8.64
205307_s_at	KMO	kynurenine 3-monooxygenase (kynurenine 3-hydroxylase)	3.24
224459_at	L2HGDH	L-2-hydroxyglutarate dehydrogenase	2.9
210712_at	LDHAL6B	lactate dehydrogenase A-like 6B	2.85
235374_at	MDH1	malate dehydrogenase 1, NAD (soluble)	2.57
1569631_at	NMNAT1	nicotinamide nucleotide adenylyltransferase 1	2.81
240440_at	NPL	N-acetylneuraminate pyruvate lyase (dihydrodipicolinate synthase)	3.52
237777_at	PFKFB1	6-phosphofructo-2-kinase/fructose-2,6-biphosphatase 1	2.23
233654_at	PIGG	phosphatidylinositol glycan anchor biosynthesis, class G	2.45
227360_at	RDH13	retinol dehydrogenase 13 (all-trans/9-cis)	4.56
220232_at	SCD5	stearoyl-CoA desaturase 5	3.58
232180_at	UGP2	UDP-glucose pyrophosphorylase 2	2.38
Protein cleavage / degradation
200001_at	CAPNS1	calpain, small subunit 1	-6.08
207232_s_at	DZIP3	DAZ interacting protein 3, zinc finger	-5.24
227625_s_at	STUB1	STIP1 homology and U-box containing protein 1	-4.86
1555831_s_at	LRRC41	leucine rich repeat containing 41	-4.11
202243_s_at	PSMB4	proteasome (prosome, macropain) subunit, beta type, 4	-3.92
200676_s_at	UBE2L3	ubiquitin-conjugating enzyme E2L 3	-3.83
218302_at	PSENEN	presenilin enhancer 2 homolog (C. elegans)	-3.79
208723_at	USP11	ubiquitin specific peptidase 11	-3.69
209042_s_at	UBE2G2	ubiquitin-conjugating enzyme E2G 2 (UBC7 homolog, yeast)	-3.36
200766_at	CTSD	cathepsin D	-3.32
223382_s_at	ZNRF1	zinc and ring finger 1	-3.25
200838_at	CTSB	cathepsin B	-3.23
201400_at	PSMB3	proteasome (prosome, macropain) subunit, beta type, 3	-3.19
235649_at	ADAMTS8	ADAM metallopeptidase with thrombospondin type 1 motif, 8	-2.88
207805_s_at	PSMD9	proteasome (prosome, macropain) 26S subunit, non-ATPase, 9	-2.88
225090_at	SYVN1	synovial apoptosis inhibitor 1, synoviolin	-2.83
203501_at	PGCP	plasma glutamate carboxypeptidase	-2.83
221337_s_at	ADAM29	ADAM metallopeptidase domain 29	-2.73
204305_at	MIPEP	mitochondrial intermediate peptidase	-2.7
218938_at	FBXL15	F-box and leucine-rich repeat protein 15	-2.62
201284_s_at	APEH	N-acylaminoacyl-peptide hydrolase	-2.56
211609_x_at	PSMD4	proteasome (prosome, macropain) 26S subunit, non-ATPase, 4	-2.52
205483_s_at	ISG15	ISG15 ubiquitin-like modifier	-2.51
244515_at	PSMD7	proteasome (prosome, macropain) 26S subunit, non-ATPase, 7	-2.43
224186_s_at	RNF123	ring finger protein 123	-2.41
206845_s_at	RNF40	ring finger protein 40	-2.39
218167_at	AMZ2	archaemetzincins-2	-2.37
204117_at	PREP	prolyl endopeptidase	-2.37
211800_s_at	USP4	ubiquitin specific peptidase 4 (proto-oncogene)	-2.3
217950_at	NOSIP	nitric oxide synthase interacting protein	-2.28
202214_s_at	CUL4B	cullin 4B	-2.25
208598_s_at	HUWE1	HECT, UBA and WWE domain containing 1	-2.24
201267_s_at	PSMC3	proteasome (prosome, macropain) 26S subunit, ATPase, 3	-2.23
218097_s_at	CUEDC2	CUE domain containing 2	-2.2
239272_at	MMP28	matrix metallopeptidase 28	-2.16
232301_at	UBE3B	ubiquitin protein ligase E3B	-2.12
201494_at	PRCP	prolylcarboxypeptidase (angiotensinase C)	-2.07
222435_s_at	UBE2J1	ubiquitin-conjugating enzyme E2, J1 (UBC6 homolog, yeast)	-2.06
212638_s_at	WWP1	WW domain containing E3 ubiquitin protein ligase 1	-2.03
223050_s_at	FBXW5	F-box and WD repeat domain containing 5	-2.01
223229_at	UBE2T	ubiquitin-conjugating enzyme E2T (putative)	-2.01
241705_at	ABCA5	ATP-binding cassette, sub-family A (ABC1), member 5	2.45
225431_x_at	ACY1L2	peptidase M20 domain containing 2	2.02
232570_s_at	ADAM33	ADAM metallopeptidase domain 33	4.02
226997_at	ADAMTS12	ADAM metallopeptidase with thrombospondin type 1 motif, 12	5.09
220208_at	ADAMTS13	ADAM metallopeptidase with thrombospondin type 1 motif, 13	2.32
1564679_at	ASB15	ankyrin repeat and SOCS box-containing 15	2.18
1559820_at	ATG10	ATG10 autophagy related 10 homolog (S. cerevisiae)	2.81
202701_at	BMP1	bone morphogenetic protein 1	2.04
1557321_a_at	CAPN14	calpain 14	2.23
239299_at	DDI1	DDI1, DNA-damage inducible 1, homolog 1 (S. cerevisiae)	2.16
241472_at	DMXL1	Dmx-like 1	2.81
1555412_at	FBXL21	F-box and leucine-rich repeat protein 21	6.96
241762_at	FBXO32	F-box protein 32	2.56
220550_at	FBXO4	F-box protein 4	3.09
243649_at	FBXO7	F-box protein 7	2.22
207460_at	GZMM	granzyme M (lymphocyte met-ase 1)	2.29
236294_at	HUWE1	HECT, UBA and WWE domain containing 1	2.86
236235_at	ITCH	itchy homolog E3 ubiquitin protein ligase (mouse)	2.33
209972_s_at	JTV1	JTV1 gene	2.28
208387_s_at	MMP24	matrix metallopeptidase 24 (membrane-inserted)	3.93
228097_at	MYLIP	myosin regulatory light chain interacting protein	2.57
241596_at	NUDT10	nudix (nucleoside diphosphate linked moiety X)-type motif 10	2.09
232521_at	PCSK7	proprotein convertase subtilisin/kexin type 7	3.25
229644_at	PREP	prolyl endopeptidase	3.25
226619_at	SENP1	SUMO1/sentrin specific peptidase 1	2.33
223948_s_at	TMPRSS3	transmembrane protease, serine 3	6.77
202954_at	UBE2C	ubiquitin-conjugating enzyme E2C	2.12
225209_s_at	UBE2J2	ubiquitin-conjugating enzyme E2, J2 (UBC6 homolog, yeast)	2.02
234166_at	UBE3A	ubiquitin protein ligase E3A	5.42
220422_at	UBQLN3	ubiquilin 3	3.43
1566896_at	UNQ1887	signal peptide peptidase 3	5.29
244121_at	UBR3	ubiquitin protein ligase E3 component n-recognin 3 (putative)	2.11
Protein folding
200654_at	P4HB	procollagen-proline, 2-oxoglutarate 4-dioxygenase (proline 4-hydroxylase), beta polypeptide	-4.14
200968_s_at	PPIB	peptidylprolyl isomerase B (cyclophilin B)	-3.77
210502_s_at	PPIE	peptidylprolyl isomerase E (cyclophilin E)	-3.77
207132_x_at	PFDN5	prefoldin subunit 5	-2.47
207618_s_at	BCS1L	BCS1-like (yeast)	-2.32
243414_at	PPIL2	peptidylprolyl isomerase (cyclophilin)-like 2	2.12
236187_s_at	PPIL6	peptidylprolyl isomerase (cyclophilin)-like 6	4.45
Protein modification
200964_at	UBE1	ubiquitin-activating enzyme E1	-6.76
217786_at	PRMT5	protein arginine methyltransferase 5	-5.02
201229_s_at	ARIH2	ariadne homolog 2 (Drosophila)	-4.62
219408_at	PRMT7	protein arginine methyltransferase 7	-4.42
208689_s_at	RPN2	ribophorin II	-4.35
212256_at	GALNT10	UDP-N-acetyl-alpha-D-galactosamine:polypeptide-N-acetylgalactosaminyltransferase 10 (GalNAc-T10)	-3.81
211296_x_at	UBC	ubiquitin C	-3.42
1555702_a_at	ST3GAL3	ST3 beta-galactoside alpha-2,3-sialyltransferase 3	-3.4
201419_at	BAP1	BRCA1 associated protein-1 (ubiquitin carboxy-terminal hydrolase)	-3.38
200920_s_at	BTG1	B-cell translocation gene 1, anti-proliferative	-3.32
202619_s_at	PLOD2	procollagen-lysine, 2-oxoglutarate 5-dioxygenase 2	-3.27
209228_x_at	TUSC3	tumor suppressor candidate 3	-3.27
205757_at	ENTPD5	ectonucleoside triphosphate diphosphohydrolase 5	-3.1
205652_s_at	TTLL1	tubulin tyrosine ligase-like family, member 1	-2.95
217797_at	UFC1	ubiquitin-fold modifier conjugating enzyme 1	-2.91
232683_s_at	PARP6	poly (ADP-ribose) polymerase family, member 6	-2.8
222524_s_at	ASB6	ankyrin repeat and SOCS box-containing 6	-2.74
209471_s_at	FNTA	farnesyltransferase, CAAX box, alpha	-2.71
208270_s_at	RNPEP	arginyl aminopeptidase (aminopeptidase B)	-2.69
200083_at	USP22	ubiquitin specific peptidase 22	-2.66
209861_s_at	METAP2	methionyl aminopeptidase 2	-2.65
202098_s_at	PRMT2	protein arginine methyltransferase 2	-2.42
208941_s_at	SEPHS1	selenophosphate synthetase 1	-2.4
217867_x_at	BACE2	beta-site APP-cleaving enzyme 2	-2.15
1554079_at	GALNTL4	UDP-N-acetyl-alpha-D-galactosamine:polypeptide-N-acetylgalactosaminyltransferase-like 4	-2.13
228042_at	ADPRH	ADP-ribosylarginine hydrolase	2.84
223976_at	FUT10	fucosyltransferase 10 (alpha (1,3) fucosyltransferase)	2.82
208505_s_at	FUT2	fucosyltransferase 2 (secretor status included)	3.09
203398_s_at	GALNT3	UDP-N-acetyl-alpha-D-galactosamine:polypeptide-N-acetylgalactosaminyltransferase 3 (GalNAc-T3)	10.3
220442_at	GALNT4	UDP-N-acetyl-alpha-D-galactosamine:polypeptide-N-acetylgalactosaminyltransferase 4 (GalNAc-T4)	2.44
237183_at	GALNT5	UDP-N-acetyl-alpha-D-galactosamine:polypeptide-N-acetylgalactosaminyltransferase 5 (GalNAc-T5)	3.4
219956_at	GALNT6	UDP-N-acetyl-alpha-D-galactosamine:polypeptide-N-acetylgalactosaminyltransferase 6 (GalNAc-T6)	5.42
227695_at	GLYATL1	glycine-N-acyltransferase-like 1	2.21
203778_at	MANBA	mannosidase, beta A, lysosomal	2.13
207563_s_at	OGT	O-linked N-acetylglucosamine (GlcNAc) transferase (UDP-N-acetylglucosamine:polypeptide-N-acetylglucosaminyl transferase)	2.74
1554384_at	PADI2	peptidyl arginine deiminase, type I	2.03
216183_at	TGM2	transglutaminase 2 (C polypeptide, protein-glutamine-gamma-glutamyltransferase)	2.58
1555065_x_at	USP6	ubiquitin specific peptidase 6 (Tre-2 oncogene)	3.26
236190_at	XYLT1	xylosyltransferase I	2.45
1563502_at	ZDHHC2	zinc finger, DHHC-type containing 2	2.76
RNA processing
206061_s_at	DICER1	Dicer1, Dcr-1 homolog (Drosophila)	-2.63
218947_s_at	PAPD1	PAP associated domain containing 1	-2.63
208821_at	SNRPB	small nuclear ribonucleoprotein polypeptides B and B1	-2.44
222035_s_at	PAPOLA	poly(A) polymerase alpha	-2.24
214543_x_at	QKI	quaking homolog, KH domain RNA binding (mouse)	-2.24
33132_at	CPSF1	cleavage and polyadenylation specific factor 1, 160kDa	-5.76
233208_x_at	CPSF2	cleavage and polyadenylation specific factor 2, 100kDa	-3.71
225805_at	HNRNPU	heterogeneous nuclear ribonucleoprotein U (scaffold attachment factor A)	-4.97
200000_s_at	PRPF8	PRP8 pre-mRNA processing factor 8 homolog (S. cerevisiae)	-4.77
217821_s_at	WBP11	WW domain binding protein 11	-3.18
200997_at	RBM4	RNA binding motif protein 4	-2.54
205292_s_at	HNRNPA2B1	heterogeneous nuclear ribonucleoprotein A2/B1	-2.52
213729_at	PRPF40A	PRP40 pre-mRNA processing factor 40 homolog A (S. cerevisiae)	-2.08
212626_x_at	HNRNPC	heterogeneous nuclear ribonucleoprotein C (C1/C2)	-3.4
222398_s_at	EFTUD2	elongation factor Tu GTP binding domain containing 2	-3.29
201584_s_at	DDX39	DEAD (Asp-Glu-Ala-Asp) box polypeptide 39	-3.17
226898_s_at	SFPQ	splicing factor proline/glutamine-rich (polypyrimidine tract binding protein associated)	-3.09
217840_at	DDX41	DEAD (Asp-Glu-Ala-Asp) box polypeptide 41	-2.73
215157_x_at	PABPC1	poly(A) binding protein, cytoplasmic 1	-2.31
209669_s_at	SERBP1	SERPINE1 mRNA binding protein 1	-2.36
213653_at	METTL3	methyltransferase like 3	-2.55
200041_s_at	BAT1	HLA-B associated transcript 1	-6.49
222609_s_at	EXOSC1	exosome component 1	-3.67
209820_s_at	TBL3	transducin (beta)-like 3	-3.66
209233_at	EMG1	EMG1 nucleolar protein homolog (S. cerevisiae)	-2.5
219110_at	NOLA1	nucleolar protein family A, member 1 (H/ACA small nucleolar RNPs)	-2.03
201698_s_at	SFRS9	splicing factor, arginine/serine-rich 9	-5.46
202775_s_at	SFRS8	splicing factor, arginine/serine-rich 8 (suppressor-of-white-apricot homolog, Drosophila)	-3.03
225751_at	RBM17	RNA binding motif protein 17	-5.34
210463_x_at	TRMT1	TRM1 tRNA methyltransferase 1 homolog (S. cerevisiae)	-4.48
237689_at	SARS	seryl-tRNA synthetase	-2.51
223415_at	RPP25	ribonuclease P/MRP 25kDa subunit	-2.38
238966_at	BRUNOL4	bruno-like 4, RNA binding protein (Drosophila)	3.04
230497_at	BRUNOL5	bruno-like 5, RNA binding protein (Drosophila)	2.23
204113_at	CUGBP1	CUG triplet repeat, RNA binding protein 1	2.93
219328_at	DDX31	DEAD (Asp-Glu-Ala-Asp) box polypeptide 31	2.65
1568815_a_at	DDX50	DEAD (Asp-Glu-Ala-Asp) box polypeptide 50	3.11
219811_at	DGCR8	DiGeorge syndrome critical region gene 8	2.44
231916_at	EXOSC6	exosome component 6	2.42
215567_at	FCF1	FCF1 small subunit (SSU) processome component homolog (S. cerevisiae)	2.46
1554453_at	HNRPLL	heterogeneous nuclear ribonucleoprotein L-like	3.1
204371_s_at	KHSRP	KH-type splicing regulatory protein (FUSE binding protein 2)	2.51
1556929_at	PAPOLG	poly(A) polymerase gamma	2.69
236380_at	RPP14	ribonuclease P/MRP 14kDa subunit	3.14
236948_x_at	SFRS11	splicing factor, arginine/serine-rich 11	2.71
1559545_at	SNRPN	small nuclear ribonucleoprotein polypeptide N	5.39
243213_at	STAT3	SSU72 RNA polymerase II CTD phosphatase homolog (S. cerevisiae)	2.49
243834_at	TNRC6A	trinucleotide repeat containing 6A	2.26
225814_at	XRN1	5'-3' exoribonuclease 1	2.09
233878_s_at	XRN2	5'-3' exoribonuclease 2	2.58
239243_at	ZNF638	zinc finger protein 638	3.33
Signalling
206281_at	ADCYAP1	adenylate cyclase activating polypeptide 1 (pituitary)	-9.4
218921_at	SIGIRR	single immunoglobulin and toll-interleukin 1 receptor (TIR) domain	-6.49
202871_at	TRAF4	TNF receptor-associated factor 4	-6.47
213476_x_at	TUBB3	tubulin, beta 3	-5.07
225150_s_at	RTKN	rhotekin	-4.84
209355_s_at	PPAP2B	phosphatidic acid phosphatase type 2B	-4.78
221809_at	RANBP10	RAN binding protein 10	-4.69
221718_s_at	AKAP13	A kinase (PRKA) anchor protein 13	-4.48
223574_x_at	PPP2R2C	protein phosphatase 2 (formerly 2A), regulatory subunit B, gamma isoform	-4.31
218291_at	MAPBPIP	mitogen-activated protein-binding protein-interacting protein	-3.99
203851_at	IGFBP6	insulin-like growth factor binding protein 6	-3.85
209324_s_at	RGS16	regulator of G-protein signaling 16	-3.76
206107_at	RGS11	regulator of G-protein signaling 11	-3.74
200651_at	GNB2L1	guanine nucleotide binding protein (G protein), beta polypeptide 2-like 1	-3.68
218014_at	NUP85	nucleoporin 85kDa	-3.66
226213_at	ERBB3	v-erb-b2 erythroblastic leukemia viral oncogene homolog 3 (avian)	-3.61
204790_at	SMAD7	SMAD family member 7	-3.57
206462_s_at	NTRK3	neurotrophic tyrosine kinase, receptor, type 3	-3.49
202479_s_at	TRIB2	tribbles homolog 2 (Drosophila)	-3.17
201390_s_at	CSNK2B	casein kinase 2, beta polypeptide	-3.06
201502_s_at	NFKBIA	nuclear factor of kappa light polypeptide gene enhancer in B-cells inhibitor, alpha	-3.06
201162_at	IGFBP7	insulin-like growth factor binding protein 7	-3.03
222810_s_at	RASAL2	RAS protein activator like 2	-3.03
234868_s_at	GFRA4	GDNF family receptor alpha 4	-2.98
225637_at	DEF8	differentially expressed in FDCP 8 homolog (mouse)	-2.97
204738_s_at	KRIT1	KRIT1, ankyrin repeat containing	-2.92
238135_at	AGTRAP	angiotensin II receptor-associated protein	-2.91
212090_at	GRINA	glutamate receptor, ionotropic, N-methyl D-asparate-associated protein 1 (glutamate binding)	-2.88
203320_at	SH2B3	SH2B adaptor protein 3	-2.79
224790_at	DDEF1	development and differentiation enhancing factor 1	-2.77
218631_at	AVPI1	arginine vasopressin-induced 1	-2.75
209651_at	TGFB1I1	transforming growth factor beta 1 induced transcript 1	-2.75
211676_s_at	IFNGR1	interferon gamma receptor 1	-2.74
202732_at	PKIG	protein kinase (cAMP-dependent, catalytic) inhibitor gamma	-2.69
201471_s_at	SQSTM1	sequestosome 1	-2.64
35147_at	MCF2L	MCF.2 cell line derived transforming sequence-like	-2.62
177_at	PLD1	phospholipase D1, phosphatidylcholine-specific	-2.58
200896_x_at	HDGF	hepatoma-derived growth factor (high-mobility group protein 1-like)	-2.51
205447_s_at	MAP3K12	mitogen-activated protein kinase kinase kinase 12	-2.51
201405_s_at	COPS6	COP9 constitutive photomorphogenic homolog subunit 6 (Arabidopsis)	-2.5
228882_at	TUB	tubby homolog (mouse)	-2.5
205842_s_at	JAK2	Janus kinase 2 (a protein tyrosine kinase)	-2.46
205112_at	PLCE1	phospholipase C, epsilon 1	-2.46
211941_s_at	PEBP1	phosphatidylethanolamine binding protein 1	-2.45
216289_at	GPR144	G protein-coupled receptor 144	-2.42
211537_x_at	MAP3K7	mitogen-activated protein kinase kinase kinase 7	-2.42
201895_at	ARAF	v-raf murine sarcoma 3611 viral oncogene homolog	-2.38
1554623_x_at	DGKE	diacylglycerol kinase, epsilon 64kDa	-2.36
1554863_s_at	DOK5	docking protein 5	-2.29
206249_at	MAP3K13	mitogen-activated protein kinase kinase kinase 13	-2.28
209336_at	PWP2	PWP2 periodic tryptophan protein homolog (yeast)	-2.23
201810_s_at	SH3BP5	SH3-domain binding protein 5 (BTK-associated)	-2.23
202092_s_at	ARL2BP	ADP-ribosylation factor-like 2 binding protein	-2.08
218192_at	IHPK2	inositol hexaphosphate kinase 2	-2.08
218387_s_at	PGLS	6-phosphogluconolactonase	-2.08
232062_at	ADCY1	adenylate cyclase 1 (brain)	2.25
213219_at	ADCY2	adenylate cyclase 2 (brain)	4.28
209186_at	ATP2A2	ATPase, Ca++ transporting, cardiac muscle, slow twitch 2	2.12
1565844_at	BRPF3	bromodomain and PHD finger containing, 3	2.46
238413_at	CDR2	cerebellar degeneration-related protein 2, 62kDa	2.08
221378_at	CER1	cerberus 1, cysteine knot superfamily, homolog (Xenopus laevis)	2.19
1559633_a_at	CHRM3	cholinergic receptor, muscarinic 3	2.92
229116_at	CNKSR2	connector enhancer of kinase suppressor of Ras 2	2.15
207897_at	CRHR2	corticotropin releasing hormone receptor 2	2.29
201044_x_at	DUSP1	dual specificity phosphatase 1	3.08
232896_at	ERBB2IP	erbb2 interacting protein	4.22
210973_s_at	FGFR1	fibroblast growth factor receptor 1 (fms-related tyrosine kinase 2, Pfeiffer syndrome)	2.63
228768_at	FNIP1	folliculin interacting protein 1	2.11
206678_at	GABRA1	gamma-aminobutyric acid (GABA) A receptor, alpha 1	4.23
1568601_at	GAD2	glutamate decarboxylase 2 (pancreatic islets and brain, 65kDa)	4.74
233887_at	GPR126	G protein-coupled receptor 126	2.11
207651_at	GPR171	G protein-coupled receptor 171	2.78
222953_at	GPR83	G protein-coupled receptor 83	5.38
210761_s_at	GRB7	growth factor receptor-bound protein 7	3.14
217565_at	GRIA3	glutamate receptor, ionotrophic, AMPA 3	3.22
233220_at	GRIN3A	glutamate receptor, ionotropic, N-methyl-D-aspartate 3A	3.82
231700_at	GUCA1A	guanylate cyclase activator 1A (retina)	6.83
209960_at	HGF	hepatocyte growth factor (hepapoietin A; scatter factor)	3.62
206944_at	HTR6	5-hydroxytryptamine (serotonin) receptor 6	2.27
208441_at	IGF1R	insulin-like growth factor 1 receptor	2.21
242694_at	IQSEC3	IQ motif and Sec7 domain 3	3.16
242517_at	KISS1R	KISS1 receptor	5.84
226158_at	KLHL24	kelch-like 24 (Drosophila)	2.03
213880_at	LGR5	leucine-rich repeat-containing G protein-coupled receptor 5	2.41
244224_x_at	LYNX1	Ly6/neurotoxin 1	2.52
229960_at	MAP3K6	mitogen-activated protein kinase kinase kinase 6	2.69
217599_s_at	MDFIC	MyoD family inhibitor domain containing	5.48
1560974_s_at	NOS1	nitric oxide synthase 1 (neuronal)	3.51
210037_s_at	NOS2A	nitric oxide synthase 2A (inducible, hepatocytes)	4.15
219789_at	NPR3	natriuretic peptide receptor C/guanylate cyclase C (atrionatriuretic peptide receptor C)	3.3
221344_at	OR12D2	olfactory receptor, family 12, subfamily D, member 2	2.67
221426_s_at	OR3A3	olfactory receptor, family 3, subfamily A, member 3	2.37
204449_at	PDCL	phosducin-like	2.78
224411_at	PLA2G12B	phospholipase A2, group XIIB	2.58
1562240_at	PLXNA4A	plexin A4	2.32
228823_at	POLR2J2	RAS p21 protein activator 4	2.19
228137_s_at	PPP2R2C	protein phosphatase 2 (formerly 2A), regulatory subunit B, gamma isoform	4.3
1554364_at	PPP2R5C	protein phosphatase 2, regulatory subunit B', gamma isoform	3.12
213950_s_at	PPP3CC	protein phosphatase 3 (formerly 2B), catalytic subunit, gamma isoform	2.01
206248_at	PRKCE	protein kinase C, epsilon	4.19
234450_at	PROKR2	prokineticin receptor 2	3.37
203110_at	PTK2B	PTK2B protein tyrosine kinase 2 beta	3.22
242458_at	RALGPS2	Ral GEF with PH domain and SH3 binding motif 2	2.04
219112_at	RAPGEF6	Rap guanine nucleotide exchange factor (GEF) 6	2.28
211605_s_at	RARA	retinoic acid receptor, alpha	4.93
242531_at	RRAGC	Ras-related GTP binding C	5.16
1553326_at	RXFP2	relaxin/insulin-like family peptide receptor 2	2.3
223483_at	SERGEF	secretion regulating guanine nucleotide exchange factor	2.65
222169_x_at	SH2D3A	SH2 domain containing 3A	4.73
218629_at	SMO	smoothened homolog (Drosophila)	2.41
213921_at	SST	somatostatin	4.24
217455_s_at	SSTR2	somatostatin receptor 2	2.71
1560101_at	SYDE2	synapse defective 1, Rho GTPase, homolog 2 (C. elegans)	2.25
221394_at	TAAR2	trace amine associated receptor 2	3.25
221508_at	TAOK3	TAO kinase 3	2.6
216511_s_at	TCF7L2	transcription factor 7-like 2 (T-cell specific, HMG-box)	3.55
236561_at	TGFBR1	transforming growth factor, beta receptor 1	2.85
238858_at	TIFA	TRAF-interacting protein with forkhead-associated domain	4.06
227233_at	TSPAN2	tetraspanin 2	2.47
Stress response
200811_at	CIRBP	cold inducible RNA binding protein	-2.18
223199_at	MKNK2	MAP kinase interacting serine/threonine kinase 2	-3.24
201841_s_at	HSPB1	heat shock 27kDa protein 1	-12.8
1554462_a_at	DNAJB9	DnaJ (Hsp40) homolog, subfamily B, member 9	-3.3
201348_at	GPX3	glutathione peroxidase 3 (plasma)	-5.08
1560587_s_at	PRDX5	peroxiredoxin 5	-3.72
201106_at	GPX4	glutathione peroxidase 4 (phospholipid hydroperoxidase)	-3.32
200736_s_at	GPX1	glutathione peroxidase 1	-3.12
200862_at	DHCR24	24-dehydrocholesterol reductase	-2.19
208814_at	HSPA4	heat shock 70kDa protein 4	-3.2
200942_s_at	HSBP1	heat shock factor binding protein 1	-2.4
211561_x_at	MAPK14	mitogen-activated protein kinase 14	-5.24
209917_s_at	TP53AP1	TP53 activated protein 1	-2.96
242562_at	DPH4	DPH4, JJJ3 homolog (S. cerevisiae)	2.94
223910_at	ERN2	endoplasmic reticulum to nucleus signaling 2	2.34
1556069_s_at	HIF3A	hypoxia inducible factor 3, alpha subunit	2.17
1561937_x_at	MAPKAPK5	mitogen-activated protein kinase-activated protein kinase 5	2.06
212302_at	RTF1	Rtf1, Paf1/RNA polymerase II complex component, homolog (S. cerevisiae)	2.72
202557_at	STCH	heat shock protein 70kDa family, member 13	2.26
Transcription
203782_s_at	POLRMT	polymerase (RNA) mitochondrial (DNA directed)	-6.64
218229_s_at	POGK	pogo transposable element with KRAB domain	-5.78
208831_x_at	SUPT6H	suppressor of Ty 6 homolog (S. cerevisiae)	-5.57
222065_s_at	FLII	flightless I homolog (Drosophila)	-5.32
223284_at	NAT14	N-acetyltransferase 14	-4.93
204188_s_at	RARG	retinoic acid receptor, gamma	-4.74
207630_s_at	CREM	cAMP responsive element modulator	-4.73
212032_s_at	PTOV1	prostate tumor overexpressed gene 1	-4.71
209511_at	POLR2F	polymerase (RNA) II (DNA directed) polypeptide F	-4.42
203258_at	DRAP1	DR1-associated protein 1 (negative cofactor 2 alpha)	-4.15
203249_at	EZH1	enhancer of zeste homolog 1 (Drosophila)	-3.74
1563830_a_at	FHAD1	forkhead-associated (FHA) phosphopeptide binding domain 1	-3.68
43544_at	MED16	mediator complex subunit 16	-3.58
202354_s_at	GTF2F1	general transcription factor IIF, polypeptide 1, 74kDa	-3.57
209338_at	TFCP2	transcription factor CP2	-3.57
225140_at	KLF3	Kruppel-like factor 3 (basic)	-3.49
206059_at	ZNF91	zinc finger protein 91	-3.46
229009_at	SIX5	SIX homeobox 5	-3.43
210829_s_at	SSBP2	single-stranded DNA binding protein 2	-3.3
214600_at	TEAD1	TEA domain family member 1 (SV40 transcriptional enhancer factor)	-3.23
209204_at	LMO4	LIM domain only 4	-2.94
235582_at	E2F2	E2F transcription factor 2	-2.93
220607_x_at	TH1L	TH1-like (Drosophila)	-2.91
228145_s_at	ZNF398	zinc finger protein 398	-2.9
218742_at	NARFL	nuclear prelamin A recognition factor-like	-2.83
1562133_x_at	ZNF90	zinc finger protein 90	-2.83
207690_at	ALX3	aristaless-like homeobox 3	-2.8
209675_s_at	HNRPUL1	heterogeneous nuclear ribonucleoprotein U-like 1	-2.78
213917_at	PAX8	paired box 8	-2.77
201683_x_at	TOX4	TOX high mobility group box family member 4	-2.76
224914_s_at	CIP29	cytokine induced protein 29 kDa	-2.73
201459_at	RUVBL2	RuvB-like 2 (E. coli)	-2.73
1558894_a_at	CCDC67	coiled-coil domain containing 67	-2.71
223479_s_at	CHCHD5	coiled-coil-helix-coiled-coil-helix domain containing 5	-2.69
205690_s_at	BUD31	BUD31 homolog (S. cerevisiae)	-2.68
224976_at	NFIA	nuclear factor I/A	-2.63
200085_s_at	TCEB2	transcription elongation factor B (SIII), polypeptide 2 (18kDa, elongin B)	-2.63
237362_at	ZFP41	zinc finger protein 41 homolog (mouse)	-2.62
1567214_a_at	PNN	pinin, desmosome associated protein	-2.61
213298_at	NFIC	nuclear factor I/C (CCAAT-binding transcription factor)	-2.6
215104_at	NRIP2	nuclear receptor interacting protein 2	-2.57
218206_x_at	SCAND1	SCAN domain containing 1	-2.56
225840_at	TEF	thyrotrophic embryonic factor	-2.54
218215_s_at	NR1H2	nuclear receptor subfamily 1, group H, member 2	-2.48
214670_at	ZKSCAN1	zinc finger with KRAB and SCAN domains 1	-2.48
210125_s_at	BANF1	barrier to autointegration factor 1	-2.45
215038_s_at	SETD2	SET domain containing 2	-2.45
224130_s_at	SRA1	steroid receptor RNA activator 1	-2.41
225156_at	ELOF1	elongation factor 1 homolog (S. cerevisiae)	-2.39
1570486_at	SOX6	SRY (sex determining region Y)-box 6	-2.38
220250_at	ZNF286A	zinc finger protein 286A	-2.34
212955_s_at	POLR2I	polymerase (RNA) II (DNA directed) polypeptide I, 14.5kDa	-2.33
235729_at	ZNF514	zinc finger protein 514	-2.32
213032_at	NFIB	nuclear factor I/B	-2.31
209382_at	POLR3C	polymerase (RNA) III (DNA directed) polypeptide C (62kD)	-2.3
218312_s_at	ZSCAN18	zinc finger and SCAN domain containing 18	-2.29
201182_s_at	CHD4	chromodomain helicase DNA binding protein 4	-2.27
204132_s_at	FOXO3	forkhead box O3	-2.27
217804_s_at	ILF3	interleukin enhancer binding factor 3, 90kDa	-2.25
205181_at	ZNF193	zinc finger protein 193	-2.25
227399_at	VGLL3	vestigial like 3 (Drosophila)	-2.24
206140_at	LHX2	LIM homeobox 2	-2.23
230368_at	ERF	Ets2 repressor factor	-2.22
215684_s_at	ASCC2	activating signal cointegrator 1 complex subunit 2	-2.21
222451_s_at	ZDHHC9	zinc finger, DHHC-type containing 9	-2.18
218987_at	ATF7IP	activating transcription factor 7 interacting protein	-2.14
201606_s_at	PWP1	PWP1 homolog (S. cerevisiae)	-2.14
203985_at	ZNF212	zinc finger protein 212	-2.14
203565_s_at	MNAT1	menage a trois homolog 1, cyclin H assembly factor (Xenopus laevis)	-2.13
232780_s_at	ZNF691	zinc finger protein 691	-2.13
223033_s_at	SCYL1	SCY1-like 1 (S. cerevisiae)	-2.11
224714_at	MKI67IP	MKI67 (FHA domain) interacting nucleolar phosphoprotein	-2.09
201862_s_at	LRRFIP1	leucine rich repeat (in FLII) interacting protein 1	-2.08
1553099_at	TIGD1	tigger transposable element derived 1	-2.08
208790_s_at	PTRF	polymerase I and transcript release factor	-2.07
202484_s_at	MBD2	methyl-CpG binding domain protein 2	-2.06
218343_s_at	GTF3C3	general transcription factor IIIC, polypeptide 3, 102kDa	-2.05
209219_at	RDBP	RD RNA binding protein	-2.05
204432_at	SOX12	SRY (sex determining region Y)-box 12	-2.05
202176_at	ERCC3	excision repair cross-complementing rodent repair deficiency, complementation group 3	-2.04
222998_at	MAF1	MAF1 homolog (S. cerevisiae)	-2.03
206593_s_at	MED22	mediator complex subunit 22	-2.03
204327_s_at	ZNF202	zinc finger protein 202	-2.02
1552794_a_at	ZNF547	zinc finger protein 547	-2.02
240554_at	AKAP8L	A kinase (PRKA) anchor protein 8-like	2.27
1565269_s_at	ATF1	activating transcription factor 1	2.84
207728_at	ATF7IP	activating transcription factor 7 interacting protein	12.2
227173_s_at	BACH2	BTB and CNC homology 1, basic leucine zipper transcription factor 2	2.88
210419_at	BARX2	BARX homeobox 2	2.72
235605_at	CASZ1	castor zinc finger 1	2.02
228915_at	DACH1	dachshund homolog 1 (Drosophila)	3.31
223704_s_at	DMRT2	doublesex and mab-3 related transcription factor 2	3.8
238532_at	DPF3	D4, zinc and double PHD fingers, family 3	3.49
228361_at	E2F2	E2F transcription factor 2	2.73
231237_x_at	E2F5	E2F transcription factor 5, p130-binding	6.93
203957_at	E2F6	E2F transcription factor 6	2.8
231776_at	EOMES	eomesodermin homolog (Xenopus laevis)	3.44
217061_s_at	ETV1	ets variant gene 1	2.89
208006_at	FOXI1	forkhead box I1	2.02
1555305_at	FOXJ2	forkhead box J2	6.17
206708_at	FOXN2	forkhead box N2	2.26
241009_at	FOXN4	forkhead box N4	2.53
244128_x_at	GLIS1	GLIS family zinc finger 1	2.5
239052_at	HNRPD	heterogeneous nuclear ribonucleoprotein D (AU-rich element RNA binding protein 1, 37kDa)	4.05
228404_at	IRX2	iroquois homeobox 2	2.21
216023_at	JMJD2B	jumonji domain containing 2B	2.43
239285_at	JMJD2C	jumonji domain containing 2C	2.59
208960_s_at	KLF6	Kruppel-like factor 6	2.78
242360_at	LDB2	LIM domain binding 2	2.86
217120_s_at	MED14	mediator complex subunit 14	2.88
221650_s_at	MED18	mediator complex subunit 18	2.22
221598_s_at	MED27	mediator complex subunit 27	2.55
243668_at	MED28	mediator complex subunit 28	2.52
236241_at	MED31	mediator complex subunit 31	2.33
243857_at	MORF4L2	mortality factor 4 like 2	2.01
203346_s_at	MTF2	metal response element binding transcription factor 2	2.19
237209_s_at	NFRKB	nuclear factor related to kappaB binding protein	4.09
233446_at	ONECUT2	one cut homeobox 2	2.59
240687_at	PASD1	PAS domain containing 1	3.63
211393_at	PATZ1	POZ (BTB) and AT hook containing zinc finger 1	2.87
206228_at	PAX2	paired box 2	3.23
223900_s_at	PBRM1	polybromo 1	6.69
1569906_s_at	PHF20	PHD finger protein 20	2.35
232857_at	POLR3H	polymerase (RNA) III (DNA directed) polypeptide H (22.9kD)	2.09
207725_at	POU4F2	POU class 4 homeobox 2	3.55
210905_x_at	POU5F1P4	POU class 5 homeobox 1 pseudogene 4	3.06
210758_at	PSIP1	PC4 and SFRS1 interacting protein 1	2.36
1563770_at	RP1-27O5.1	zinc finger and BTB domain containing 8-like	2.32
219382_at	SERTAD3	SERTA domain containing 3	2.22
1552796_a_at	SIM1	single-minded homolog 1 (Drosophila)	2.21
1567906_at	SOX4	SRY (sex determining region Y)-box 4	2.19
232529_at	SP3	Sp3 transcription factor	2.1
1568951_at	SUHW4	zinc finger protein 280D	2.04
1566191_at	SUZ12	suppressor of zeste 12 homolog (Drosophila)	5.94
215272_at	TADA3L	transcriptional adaptor 3 (NGG1 homolog, yeast)-like	3.38
233633_at	TBL1XR1	transducin (beta)-like 1 X-linked receptor 1	5.19
1566207_at	TCEA1	transcription elongation factor A (SII), 1	3.28
1570625_at	TCEB3	transcription elongation factor B (SIII), polypeptide 3 (110kDa, elongin A)	2.53
238520_at	TRERF1	transcriptional regulating factor 1	2.01
204728_s_at	WDHD1	WD repeat and HMG-box DNA binding protein 1	4.16
242433_at	ZBTB11	zinc finger and BTB domain containing 11	4.1
234338_s_at	ZBTB47	zinc finger and BTB domain containing 47	2.88
237463_at	ZFPM1	zinc finger protein, multitype 1	3.77
238631_at	ZNF140	zinc finger protein 140	2.33
219495_s_at	ZNF180	zinc finger protein 180	2.54
236551_at	ZNF311	zinc finger protein 311	4.58
219224_x_at	ZNF408	zinc finger protein 408	2
238614_x_at	ZNF430	zinc finger protein 430	2.61
240155_x_at	ZNF493	zinc finger protein 493	2.55
1570238_at	ZNF527	zinc finger protein 527	4.11
235200_at	ZNF561	zinc finger protein 561	2.24
1562267_s_at	ZNF709	zinc finger protein 709	2.7
241602_at	ZNF582	zinc finger protein 582	2.24
231820_x_at	ZNF587	zinc finger protein 587	2.21
242915_at	ZNF682	zinc finger protein 682	2.43
228631_s_at	ZNF688	zinc finger protein 688	2.57
206557_at	ZNF702	zinc finger protein 702 pseudogene	7.66
1558755_x_at	ZNF763	zinc finger protein 763	2.31
1562651_at	ZSCAN1	zinc finger and SCAN domain containing 1	2.25
230106_at	ZXDC	ZXD family zinc finger C	2.97
Translation
201113_at	TUFM	Tu translation elongation factor, mitochondrial	-2.62
217747_s_at	RPS9	ribosomal protein S9	-6.21
203931_s_at	MRPL12	mitochondrial ribosomal protein L12	-5.9
211710_x_at	RPL4	ribosomal protein L4	-5.46
211666_x_at	RPL3	ribosomal protein L3	-5.25
212191_x_at	RPL13	ribosomal protein L13	-4.93
218112_at	MRPS34	mitochondrial ribosomal protein S34	-4.79
222775_s_at	MRPL35	mitochondrial ribosomal protein L35	-4.68
200010_at	RPL11	ribosomal protein L11	-4.47
200022_at	RPL18	ribosomal protein L18	-3.77
227186_s_at	MRPL41	mitochondrial ribosomal protein L41	-3.69
201258_at	RPS16	ribosomal protein S16	-3.5
210646_x_at	RPL13A	ribosomal protein L13a	-3.47
218001_at	MRPS2	mitochondrial ribosomal protein S2	-3.33
213969_x_at	RPL29	ribosomal protein L29	-3.31
200003_s_at	RPL28	ribosomal protein L28	-3.1
200819_s_at	RPS15	ribosomal protein S15	-3.06
201049_s_at	RPS18	ribosomal protein S18	-3.03
204599_s_at	MRPL28	mitochondrial ribosomal protein L28	-2.86
213414_s_at	RPS19	ribosomal protein S19	-2.86
222216_s_at	MRPL17	mitochondrial ribosomal protein L17	-2.8
218270_at	MRPL24	mitochondrial ribosomal protein L24	-2.76
221269_s_at	SH3BGRL3	SH3 domain binding glutamic acid-rich protein like 3	-2.65
200002_at	RPL35	ribosomal protein L35	-2.63
223743_s_at	MRPL4	mitochondrial ribosomal protein L4	-2.62
200036_s_at	RPL10A	ribosomal protein L10a	-2.61
221798_x_at	RPS2	ribosomal protein S2	-2.5
224877_s_at	MRPS5	mitochondrial ribosomal protein S5	-2.41
225201_s_at	MRPL14	mitochondrial ribosomal protein L14	-2.4
224930_x_at	RPL7A	ribosomal protein L7a	-2.4
201254_x_at	RPS6	ribosomal protein S6	-2.28
213897_s_at	MRPL23	mitochondrial ribosomal protein L23	-2.13
200817_x_at	RPS10	ribosomal protein S10	-2.12
200013_at	RPL24	ribosomal protein L24	-2.09
200062_s_at	RPL30	ribosomal protein L30	-2.08
200963_x_at	RPL31	ribosomal protein L31	-2.08
200909_s_at	RPLP2	ribosomal protein, large, P2	-4.07
200763_s_at	RPLP1	ribosomal protein, large, P1	-2.79
208756_at	EIF3I	eukaryotic translation initiation factor 3, subunit I	-5.79
204283_at	FARS2	phenylalanyl-tRNA synthetase 2, mitochondrial	-5.74
202802_at	DHPS	deoxyhypusine synthase	-5.26
201797_s_at	VARS	valyl-tRNA synthetase	-5.18
204102_s_at	EEF2	eukaryotic translation elongation factor 2	-4.99
203462_x_at	EIF3B	eukaryotic translation initiation factor 3, subunit B	-3.97
229063_s_at	CCDC107	coiled-coil domain containing 107	-3.9
200647_x_at	EIF3C	eukaryotic translation initiation factor 3, subunit C	-3.3
211787_s_at	EIF4A1	eukaryotic translation initiation factor 4A, isoform 1	-3.04
211345_x_at	EEF1G	eukaryotic translation elongation factor 1 gamma	-3.01
212227_x_at	EIF1	eukaryotic translation initiation factor 1	-2.82
222427_s_at	LARS	leucyl-tRNA synthetase	-2.75
203113_s_at	EEF1D	eukaryotic translation elongation factor 1 delta (guanine nucleotide exchange protein)	-2.65
206621_s_at	EIF4H	eukaryotic translation initiation factor 4H	-2.61
200005_at	EIF3D	eukaryotic translation initiation factor 3, subunit D	-2.28
201810_s_at	SH3BP5	SH3-domain binding protein 5 (BTK-associated)	-2.23
202461_at	EIF2B2	eukaryotic translation initiation factor 2B, subunit 2 beta, 39kDa	-2.07
200596_s_at	EIF3A	eukaryotic translation initiation factor 3, subunit A	-2.03
231023_at	CARS2	cysteinyl-tRNA synthetase 2, mitochondrial (putative)	2.59
1554310_a_at	EIF4G3	eukaryotic translation initiation factor 4 gamma, 3	2.05
204825_at	MELK	maternal embryonic leucine zipper kinase	2.95
223292_s_at	MRPS15	mitochondrial ribosomal protein S15	6.14
214661_s_at	NOL14	nucleolar protein 14	2.19
208876_s_at	PAK2	p21 (CDKN1A)-activated kinase 2	2.92
201796_s_at	VARS	valyl-tRNA synthetase	3.68
Transport
200924_s_at	SLC3A2	solute carrier family 3 (activators of dibasic and neutral amino acid transport), member 2	-6.17
203849_s_at	KIF1A	kinesin family member 1A	-3.02
225251_at	RAB24	RAB24, member RAS oncogene family	-2.43
225175_s_at	SLC44A2	solute carrier family 44, member 2	-2.06
209298_s_at	ITSN1	intersectin 1 (SH3 domain protein)	-2.27
204925_at	CTNS	cystinosis, nephropathic	-3.26
225064_at	RABEP1	rabaptin, RAB GTPase binding effector protein 1	-2.87
240039_at	PLA2R1	phospholipase A2 receptor 1, 180kDa	-2.69
200785_s_at	LRP1	low density lipoprotein-related protein 1 (alpha-2-macroglobulin receptor)	-2.56
200991_s_at	SNX17	sorting nexin 17	-7.05
224482_s_at	RAB11FIP4	RAB11 family interacting protein 4 (class II)	-2.86
224949_at	YIPF5	Yip1 domain family, member 5	-4.76
225294_s_at	TRAPPC1	trafficking protein particle complex 1	-4.44
201264_at	COPE	coatomer protein complex, subunit epsilon	-3.83
200837_at	BCAP31	B-cell receptor-associated protein 31	-3.18
217726_at	COPZ1	coatomer protein complex, subunit zeta 1	-3.07
225870_s_at	TRAPPC5	trafficking protein particle complex 5	-2.79
201831_s_at	VDP	vesicle docking protein p115	-2.79
238628_s_at	TRAPPC2L	trafficking protein particle complex 2-like	-2.47
202323_s_at	ACBD3	acyl-Coenzyme A binding domain containing 3	-2.43
202361_at	SEC24C	SEC24 related gene family, member C (S. cerevisiae)	-2
225305_at	SLC25A29	solute carrier family 25, member 29	-3.52
227988_s_at	VPS13A	vacuolar protein sorting 13 homolog A (S. cerevisiae)	-2.83
212755_at	MON2	MON2 homolog (S. cerevisiae)	-2.7
209244_s_at	KIF1C	kinesin family member 1C	-2.22
209620_s_at	ABCB7	ATP-binding cassette, sub-family B (MDR/TAP), member 7	-2.74
202083_s_at	SEC14L1	SEC14-like 1 (S. cerevisiae)	-2.74
222826_at	PLDN	pallidin homolog (mouse)	-3.96
202067_s_at	LDLR	low density lipoprotein receptor (familial hypercholesterolemia)	-2.63
201692_at	OPRS1	opioid receptor, sigma 1	-2.58
213453_x_at	GAPDH	glyceraldehyde-3-phosphate dehydrogenase	-3.21
202390_s_at	HD	huntingtin	-2.49
229115_at	DYNC1H1	dynein, cytoplasmic 1, heavy chain 1	-3.54
229106_at	DYNLL2	dynein, light chain, LC8-type 2	-2.99
217917_s_at	DYNLRB1	dynein, light chain, roadblock-type 1	-2.8
226010_at	SLC25A23	solute carrier family 25 (mitochondrial carrier; phosphate carrier), member 23	-2.14
202576_s_at	DDX19A	DEAD (Asp-Glu-Ala-As) box polypeptide 19A	-2.32
208922_s_at	NXF1	nuclear RNA export factor 1	-2.22
212269_s_at	MCM3AP	minichromosome maintenance complex component 3 associated protein	-4.56
201730_s_at	TPR	translocated promoter region (to activated MET oncogene)	-2.17
208974_x_at	KPNB1	karyopherin (importin) beta 1	-2.12
212318_at	TNPO3	transportin 3	-2.09
221507_at	TNPO2	transportin 2 (importin 3, karyopherin beta 2b)	-2.04
217885_at	IPO9	importin 9	-2
202483_s_at	RANBP1	RAN binding protein 1	-2.53
213515_x_at	HBG1	hemoglobin, gamma A	-7.47
204018_x_at	HBA1	hemoglobin, alpha 1	-6.5
201771_at	SCAMP3	secretory carrier membrane protein 3	-2.65
203826_s_at	PITPNM1	phosphatidylinositol transfer protein, membrane-associated 1	-2.29
200750_s_at	RAN	RAN, member RAS oncogene family	-5.85
218679_s_at	VPS28	vacuolar protein sorting 28 homolog (S. cerevisiae)	-4.57
205037_at	RABL4	RAB, member of RAS oncogene family-like 4	-4.02
217612_at	TIMM50	translocase of inner mitochondrial membrane 50 homolog (S. cerevisiae)	-3.57
208635_x_at	NACA	nascent polypeptide-associated complex alpha subunit	-3.23
206538_at	MRAS	muscle RAS oncogene homolog	-3.2
223505_s_at	RBJ	rab and DnaJ domain containing	-3.2
223241_at	SNX8	sorting nexin 8	-2.82
222742_s_at	RABL5	RAB, member RAS oncogene family-like 5	-2.01
204066_s_at	CENTG2	centaurin, gamma 2	-2.25
213190_at	COG7	component of oligomeric golgi complex 7	-2.6
201204_s_at	RRBP1	ribosome binding protein 1 homolog 180kDa (dog)	-2.16
221691_x_at	NPM1	nucleophosmin (nucleolar phosphoprotein B23, numatrin)	-3.62
1554464_a_at	CRTAP	cartilage associated protein	-2.39
212040_at	TGOLN2	trans-golgi network protein 2	-3.81
203136_at	RABAC1	Rab acceptor 1 (prenylated)	-3.92
233385_x_at	RAB4B	RAB4B, member RAS oncogene family	-3.56
219348_at	USE1	unconventional SNARE in the ER 1 homolog (S. cerevisiae)	-2.66
208074_s_at	AP2S1	adaptor-related protein complex 2, sigma 1 subunit	-3.35
200721_s_at	ACTR1A	ARP1 actin-related protein 1 homolog A, centractin alpha (yeast)	-3.04
209452_s_at	VTI1B	vesicle transport through interaction with t-SNAREs homolog 1B (yeast)	-2.94
203129_s_at	KIF5C	kinesin family member 5C	-2.8
208710_s_at	AP3D1	adaptor-related protein complex 3, delta 1 subunit	-2.67
205423_at	AP1B1	adaptor-related protein complex 1, beta 1 subunit	-2.3
222708_s_at	STX17	syntaxin 17	-2.27
211779_x_at	AP2A2	adaptor-related protein complex 2, alpha 2 subunit	-2.25
203530_s_at	STX4	syntaxin 4	-2.22
209735_at	ABCG2	ATP-binding cassette, sub-family G (WHITE), member 2	-2.45
219977_at	AIPL1	aryl hydrocarbon receptor interacting protein-like 1	2.48
220920_at	ATP10B	ATPase, class V, type 10B	4.18
241604_at	ATP11A	ATPase, class VI, type 11A	3.24
236850_at	CAPRIN1	cell cycle associated protein 1	2.15
203492_x_at	CEP57	centrosomal protein 57kDa	2.74
209365_s_at	ECM1	extracellular matrix protein 1	3.19
1569868_s_at	EME2	essential meiotic endonuclease 1 homolog 2 (S. pombe)	2.38
205237_at	FCN1	ficolin (collagen/fibrinogen domain containing) 1	2.05
229619_at	FOLR2	folate receptor 2 (fetal)	2.24
211815_s_at	GGA3	golgi associated, gamma adaptin ear containing, ARF binding protein 3	2.08
240106_at	GNPTAB	N-acetylglucosamine-1-phosphate transferase, alpha and beta subunits	2.66
239159_at	GOSR2	golgi SNAP receptor complex member 2	2.76
1554618_at	HRBL	HIV-1 Rev binding protein-like	2.08
213256_at	MARCH3	membrane-associated ring finger (C3HC4) 3	2.86
224500_s_at	MON1A	MON1 homolog A (yeast)	10.9
211916_s_at	MYO1A	myosin IA	3.33
215074_at	MYO1B	myosin IB	3.74
230123_at	NECAP2	NECAP endocytosis associated 2	2.21
236677_at	NGB	neuroglobin	2.92
218304_s_at	OSBPL11	oxysterol binding protein-like 11	2.07
1555251_a_at	OTOF	otoferlin	3.93
205925_s_at	RAB3B	RAB3B, member RAS oncogene family	3.7
220510_at	RHBG	Rh family, B glycoprotein	11.2
206667_s_at	SCAMP1	secretory carrier membrane protein 1	2.04
211565_at	SH3GL3	SH3-domain GRB2-like 3	6.09
1554724_at	SLC6A11	solute carrier family 6 (neurotransmitter transporter, GABA), member 11	4.44
206836_at	SLC6A3	solute carrier family 6 (neurotransmitter transporter, dopamine), member 3	2.24
220868_s_at	SLC7A10	solute carrier family 7, (neutral amino acid transporter, y+ system) member 10	3.63
1554686_at	STAU2	staufen, RNA binding protein, homolog 2 (Drosophila)	3.33
1569335_a_at	STRA6	stimulated by retinoic acid gene 6 homolog (mouse)	2.16
240257_at	SYNJ2	synaptojanin 2	3.93
238886_at	TMED10	transmembrane emp24-like trafficking protein 10 (yeast)	3.93
220097_s_at	TMEM104	transmembrane protein 104	4.95
208844_at	VDAC3	voltage-dependent anion channel 3	2.93
240859_at	ZFYVE16	zinc finger, FYVE domain containing 16	4.42
Miscellaneous
225080_at	MYO1C	myosin IC	-2.15
215399_s_at	OS9	amplified in osteosarcoma	-3.25
221031_s_at	APOLD1	apolipoprotein L domain containing 1	-3.13
205117_at	FGF1	fibroblast growth factor 1 (acidic)	-2.61
218825_at	EGFL7	EGF-like-domain, multiple 7	-2.32
208042_at	AGGF1	angiogenic factor with G patch and FHA domains 1	-2.13
1555092_at	VASH2	vasohibin 2	-2.49
207131_x_at	GGT1	gamma-glutamyltransferase 1	-2.3
212515_s_at	DDX3X	DEAD (Asp-Glu-Ala-Asp) box polypeptide 3, X-linked	-3.46
200959_at	FUS	fusion (involved in t(12;16) in malignant liposarcoma)	-2.64
209418_s_at	THOC5	THO complex 5	-2.45
228266_s_at	HDGFRP3	hepatoma-derived growth factor, related protein 3	-3.11
209778_at	TRIP11	thyroid hormone receptor interactor 11	-2.64
208190_s_at	LSR	lipolysis stimulated lipoprotein receptor	-4.3
219066_at	PPCDC	phosphopantothenoylcysteine decarboxylase	-2.78
217395_at	MT4	metallothionein 4	-3
219684_at	RTP4	receptor (chemosensory) transporter protein 4	-4.29
200621_at	CSRP1	cysteine and glycine-rich protein 1	-2.51
211126_s_at	CSRP2	cysteine and glycine-rich protein 2	-2.24
209009_at	ESD	esterase D/formylglutathione hydrolase	-2.94
37652_at	CABIN1	calcineurin binding protein 1	-2.94
202412_s_at	USP1	ubiquitin specific peptidase 1	-3.68
218961_s_at	PNKP	polynucleotide kinase 3'-phosphatase	-2.69
218685_s_at	SMUG1	single-strand-selective monofunctional uracil-DNA glycosylase 1	-2.55
224666_at	NSMCE1	non-SMC element 1 homolog (S. cerevisiae)	-2.38
201039_s_at	RAD23A	RAD23 homolog A (S. cerevisiae)	-2.38
200679_x_at	HMGB1	high-mobility group box 1	-2
228847_at	EXOC3	exocyst complex component 3	-2.45
209391_at	DPM2	dolichyl-phosphate mannosyltransferase polypeptide 2, regulatory subunit	-2.24
202554_s_at	GSTM3	glutathione S-transferase M3 (brain)	-2.78
223103_at	STARD10	StAR-related lipid transfer (START) domain containing 10	-3.66
210117_at	SPAG1	sperm associated antigen 1	-2.52
218164_at	SPATA20	spermatogenesis associated 20	-2.19
209072_at	MBP	myelin basic protein	-4.25
205989_s_at	MOG	myelin oligodendrocyte glycoprotein	-3.13
232983_s_at	SERGEF	secretion regulating guanine nucleotide exchange factor	-2.4
201765_s_at	HEXA	hexosaminidase A (alpha polypeptide)	-2.13
203392_s_at	CTBP1	C-terminal binding protein 1	-2.78
211456_x_at	MT1P2	metallothionein 1 pseudogene 2	-3.54
206461_x_at	MT1H	metallothionein 1H	-3.42
204326_x_at	MT1X	metallothionein 1X	-2.91
204745_x_at	MT1G	metallothionein 1G	-2.85
212185_x_at	MT2A	metallothionein 2A	-2.42
213629_x_at	MT1F	metallothionein 1F	-2.37
49679_s_at	MT1P3	metallothionein 1 pseudogene 3	-2.32
216336_x_at	MT1A	metallothionein 1A	-2.16
210830_s_at	PON2	paraoxonase 2	-4.49
206224_at	CST1	cystatin SN	-2.73
1566303_s_at	PPP1R11	protein phosphatase 1, regulatory (inhibitor) subunit 11	-3.86
203071_at	SEMA3B	sema domain, immunoglobulin domain (Ig), short basic domain, secreted, (semaphorin) 3B	-5.39
201201_at	CSTB	cystatin B (stefin B)	-3.02
204085_s_at	CLN5	ceroid-lipofuscinosis, neuronal 5	-2.36
215749_s_at	GORASP1	golgi reassembly stacking protein 1, 65kDa	-3.69
212518_at	PIP5K1C	phosphatidylinositol-4-phosphate 5-kinase, type I, gamma	-3.53
219207_at	EDC3	enhancer of mRNA decapping 3 homolog (S. cerevisiae)	-2.87
200747_s_at	NUMA1	nuclear mitotic apparatus protein 1	-2.3
201042_at	TGM2	transglutaminase 2 (C polypeptide, protein-glutamine-gamma-glutamyltransferase)	-5.85
201431_s_at	DPYSL3	dihydropyrimidinase-like 3	-3.57
211426_x_at	GNAQ	guanine nucleotide binding protein (G protein), q polypeptide	-3.08
204248_at	GNA11	guanine nucleotide binding protein (G protein), alpha 11 (Gq class)	-2.51
201058_s_at	MYL9	myosin, light chain 9, regulatory	-8.88
201318_s_at	MRCL3	myosin regulatory light chain MRCL3	-2.63
217831_s_at	NSFL1C	NSFL1 (p97) cofactor (p47)	-5.45
216033_s_at	FYN	FYN oncogene related to SRC, FGR, YES	-2.88
209148_at	RXRB	retinoid X receptor, beta	-2.02
239042_at	TSR1	TSR1, 20S rRNA accumulation, homolog (S. cerevisiae)	-2.34
234311_s_at	GTPBP10	GTP-binding protein 10 (putative)	-2.63
222975_s_at	CSDE1	cold shock domain containing E1, RNA-binding	-2.22
210609_s_at	TP53I3	tumor protein p53 inducible protein 3	-2.83
226051_at	SELM	selenoprotein M	-2.9
201194_at	SEPW1	selenoprotein W, 1	-2.45
200748_s_at	FTH1	ferritin, heavy polypeptide 1	-2.09
228252_at	PIF1	PIF1 5'-to-3' DNA helicase homolog (S. cerevisiae)	-3.59
210613_s_at	SYNGR1	synaptogyrin 1	-2.7
226168_at	ZFAND2B	zinc finger, AN1-type domain 2B	-2.2
222699_s_at	PLEKHF2	pleckstrin homology domain containing, family F (with FYVE domain) member 2	-2.07
204824_at	ENDOG	endonuclease G	-8.52
215952_s_at	OAZ1	ornithine decarboxylase antizyme 1	-4.74
204501_at	NOV	nephroblastoma overexpressed gene	-4.34
200701_at	NPC2	Niemann-Pick disease, type C2	-4.18
222407_s_at	ZFP106	zinc finger protein 106 homolog (mouse)	-4.1
218729_at	LXN	latexin	-3.75
204464_s_at	EDNRA	endothelin receptor type A	-3.18
214730_s_at	GLG1	golgi apparatus protein 1	-3.16
221747_at	TNS1	tensin 1	-3.14
218147_s_at	GLT8D1	glycosyltransferase 8 domain containing 1	-3.08
203524_s_at	MPST	mercaptopyruvate sulfurtransferase	-2.8
242871_at	PAQR5	progestin and adipoQ receptor family member V	-2.7
202477_s_at	TUBGCP2	tubulin, gamma complex associated protein 2	-2.6
202891_at	NIT1	nitrilase 1	-2.57
221848_at	ZGPAT	zinc finger, CCCH-type with G patch domain	-2.51
201175_at	TXNDC14	thioredoxin domain containing 14	-2.39
225915_at	CAB39L	calcium binding protein 39-like	-2.36
59631_at	TXNRD3	thioredoxin reductase 3	-2.35
1554155_at	MCPH1	microcephalin 1	-2.29
201147_s_at	TIMP3	TIMP metallopeptidase inhibitor 3 (Sorsby fundus dystrophy, pseudoinflammatory)	-2.27
200916_at	TAGLN2	transgelin 2	-2.14
235318_at	FBN1	fibrillin 1	-2.13
210139_s_at	PMP22	peripheral myelin protein 22	-2.11
219373_at	DPM3	dolichyl-phosphate mannosyltransferase polypeptide 3	-2.03
218070_s_at	GMPPA	GDP-mannose pyrophosphorylase A	-2.03
220842_at	AHI1	Abelson helper integration site 1	2.32
1554545_at	APOBEC4	apolipoprotein B mRNA editing enzyme, catalytic polypeptide-like 4 (putative)	2.29
207542_s_at	AQP1	aquaporin 1 (Colton blood group)	2.47
209788_s_at	ARTS-1	endoplasmic reticulum aminopeptidase 1	3.37
1553886_at	CCDC108	coiled-coil domain containing 108	3.52
229026_at	CDC42SE2	CDC42 small effector 2	3.38
234008_s_at	CES3	carboxylesterase 3 (brain)	3.4
213060_s_at	CHI3L2	chitinase 3-like 2	5.53
1567081_x_at	CLN6	ceroid-lipofuscinosis, neuronal 6, late infantile, variant	2.18
1555034_at	CLRN1	clarin 1	4.76
205630_at	CRH	corticotropin releasing hormone	6.66
222875_at	DHX33	DEAH (Asp-Glu-Ala-His) box polypeptide 33	2.19
213420_at	DHX57	DEAH (Asp-Glu-Ala-Asp/His) box polypeptide 57	2.5
220262_s_at	DLK2	delta-like 2 homolog (Drosophila)	3.08
1565716_at	FUS	fusion (involved in t(12;16) in malignant liposarcoma)	4.44
1554419_x_at	GGNBP2	gametogenetin binding protein 2	2.48
1554251_at	HP1BP3	heterochromatin protein 1, binding protein 3	3.03
1557246_at	KIDINS220	kinase D-interacting substrate of 220 kDa	2.09
213261_at	LBA1	lupus brain antigen 1	2.16
47560_at	LPHN1	latrophilin 1	2.25
206905_s_at	MATN1	matrilin 1, cartilage matrix protein	4.71
225408_at	MBP	myelin basic protein	2.42
212310_at	MIA3	melanoma inhibitory activity family, member 3	2.12
213382_at	MST1	macrophage stimulating 1 (hepatocyte growth factor-like)	2.19
1554841_at	MTHFD2L	methylenetetrahydrofolate dehydrogenase (NADP+ dependent) 2-like	3.62
218330_s_at	NAV2	neuron navigator 2	2.89
226585_at	NEIL2	nei like 2 (E. coli)	2.32
219502_at	NEIL3	nei endonuclease VIII-like 3 (E. coli)	2.26
211585_at	NPAT	nuclear protein, ataxia-telangiectasia locus	7.31
217480_x_at	NTN2L	netrin 2-like (chicken)	2.67
235130_at	PANK2	pantothenate kinase 2 (Hallervorden-Spatz syndrome)	2.73
1558164_s_at	PEX13	peroxisome biogenesis factor 13	2.53
205871_at	PLGLA1	plasminogen-like A1	2.1
204148_s_at	POMZP3	POM (POM121 homolog, rat) and ZP3 fusion	3.98
228161_at	RAB32	RAB32, member RAS oncogene family	2.77
205169_at	RBBP5	retinoblastoma binding protein 5	2.58
216049_at	RHOBTB3	Rho-related BTB domain containing 3	2.42
238731_at	SETDB2	SET domain, bifurcated 2	2.59
238404_x_at	SEZ6L2	seizure related 6 homolog (mouse)-like 2	2.1
207661_s_at	SH3PXD2A	SH3 and PX domains 2A	4.42
236845_at	TRIM62	tripartite motif-containing 62	3.43
210614_at	TTPA	tocopherol (alpha) transfer protein	3.92
216687_x_at	UGT2B15	UDP glucuronosyltransferase 2 family, polypeptide B15	2.7
233782_at	WDR68	WD repeat domain 68	3.61
237656_at	WWC2	WW and C2 domain containing 2	4.69
222493_s_at	ZFAND3	zinc finger, AN1-type domain 3	2.57
1554171_at	ZMYM3	zinc finger, MYM-type 3	2.96
220117_at	ZNF659	zinc finger protein 385D	2.27
224124_at	ZRANB3	zinc finger, RAN-binding domain containing 3	4.21
Unknown
217221_x_at	RBM10	RNA binding motif protein 10	-9.87
216383_at	hCG_2040224	ribosomal protein L18a pseudogene	-5.11
224852_at	TTC17	tetratricopeptide repeat domain 17	-5.11
209385_s_at	PROSC	proline synthetase co-transcribed homolog (bacterial)	-5.04
227549_x_at	ZDHHC24	zinc finger, DHHC-type containing 24	-5
204355_at	DHX30	DEAH (Asp-Glu-Ala-His) box polypeptide 30	-4.91
223020_at	CLPTM1L	CLPTM1-like	-4.78
209504_s_at	PLEKHB1	pleckstrin homology domain containing, family B (evectins) member 1	-4.5
221863_at	MIER2	mesoderm induction early response 1, family member 2	-4.46
228385_at	DDX59	DEAD (Asp-Glu-Ala-Asp) box polypeptide 59	-4.44
220973_s_at	SHARPIN	SHANK-associated RH domain interactor	-4.43
223905_at	CCDC135	coiled-coil domain containing 135	-4.35
220525_s_at	AUP1	ancient ubiquitous protein 1	-4.25
223072_s_at	WBP1	WW domain binding protein 1	-4.24
208906_at	BSCL2	Bernardinelli-Seip congenital lipodystrophy 2 (seipin)	-4.18
205518_s_at	CMAH	cytidine monophosphate-N-acetylneuraminic acid hydroxylase (CMP-N-acetylneuraminate monooxygenase)	-4.17
206392_s_at	RARRES1	retinoic acid receptor responder (tazarotene induced) 1	-4.13
227878_s_at	ALKBH7	alkB, alkylation repair homolog 7 (E. coli)	-4.11
217983_s_at	RNASET2	ribonuclease T2	-4.09
219644_at	CCDC41	coiled-coil domain containing 41	-3.84
219522_at	FJX1	four jointed box 1 (Drosophila)	-3.8
201378_s_at	UBAP2L	ubiquitin associated protein 2-like	-3.73
217923_at	PEF1	penta-EF-hand domain containing 1	-3.72
230997_at	TTC21A	tetratricopeptide repeat domain 21A	-3.69
204610_s_at	CCDC85B	coiled-coil domain containing 85B	-3.68
223821_s_at	SUSD4	sushi domain containing 4	-3.67
209216_at	WDR45	WD repeat domain 45	-3.62
226674_at	TMEM58	transmembrane protein 58	-3.57
224929_at	TMEM173	transmembrane protein 173	-3.56
228339_at	ECSM2	endothelial cell-specific molecule 2	-3.54
224415_s_at	HINT2	histidine triad nucleotide binding protein 2	-3.45
225149_at	PCID2	PCI domain containing 2	-3.45
221185_s_at	IQCG	IQ motif containing G	-3.44
226533_at	HINT3	histidine triad nucleotide binding protein 3	-3.42
213589_s_at	B3GNTL1	UDP-GlcNAc:betaGal beta-1,3-N-acetylglucosaminyltransferase-like 1	-3.38
222138_s_at	WDR13	WD repeat domain 13	-3.38
242247_at	METT5D1	methyltransferase 5 domain containing 1	-3.35
220261_s_at	ZDHHC4	zinc finger, DHHC-type containing 4	-3.25
226833_at	CYB5D1	cytochrome b5 domain containing 1	-3.23
223572_at	HHATL	hedgehog acyltransferase-like	-3.23
222672_at	LYRM4	LYR motif containing 4	-3.2
223152_at	PPP1R12C	protein phosphatase 1, regulatory (inhibitor) subunit 12C	-3.18
224689_at	MANBAL	mannosidase, beta A, lysosomal-like	-3.15
205740_s_at	RBM42	RNA binding motif protein 42	-3.1
218491_s_at	THYN1	thymocyte nuclear protein 1	-3.1
212100_s_at	POLDIP3	polymerase (DNA-directed), delta interacting protein 3	-3.08
203404_at	ARMCX2	armadillo repeat containing, X-linked 2	-3.01
212165_at	TMEM183A	transmembrane protein 183A	-3.01
216779_at	CYLC1	cylicin, basic protein of sperm head cytoskeleton 1	-2.92
224947_at	RNF26	ring finger protein 26	-2.91
1557085_at	PLAC1L	placenta-specific 1-like	-2.89
1553952_at	ZDHHC19	zinc finger, DHHC-type containing 19	-2.89
210676_x_at	RGPD5	RANBP2-like and GRIP domain containing 5	-2.83
217771_at	GOLM1	golgi membrane protein 1	-2.8
202250_s_at	WDR42A	WD repeat domain 42A	-2.8
218556_at	ORMDL2	ORM1-like 2 (S. cerevisiae)	-2.76
1555554_at	RP1149G10.8	breast cancer and salivary gland expression gene	-2.74
1553111_a_at	KBTBD6	kelch repeat and BTB (POZ) domain containing 6	-2.73
218798_at	KRI1	KRI1 homolog (S. cerevisiae)	-2.72
219061_s_at	LAGE3	L antigen family, member 3	-2.71
233375_at	EFCAB2	EF-hand calcium binding domain 2	-2.69
221811_at	PERLD1	per1-like domain containing 1	-2.68
1553732_s_at	CCDC123	coiled-coil domain containing 123	-2.66
208663_s_at	TTC3	tetratricopeptide repeat domain 3	-2.66
61732_r_at	IFT74	intraflagellar transport 74 homolog (Chlamydomonas)	-2.65
225727_at	PLEKHH1	pleckstrin homology domain containing, family H (with MyTH4 domain) member 1	-2.65
1553248_at	CCDC57	coiled-coil domain containing 57	-2.64
223591_at	RNF135	ring finger protein 135	-2.64
225929_s_at	RNF213	ring finger protein 213	-2.64
207582_at	PIN1L	protein (peptidylprolyl cis/trans isomerase) NIMA-interacting 1-like	-2.59
215084_s_at	LRRC42	leucine rich repeat containing 42	-2.54
224625_x_at	SERF2	small EDRK-rich factor 2	-2.54
224703_at	WDR22	WD repeat domain 22	-2.54
224298_s_at	UBAC2	UBA domain containing 2	-2.51
223179_at	YPEL3	yippee-like 3 (Drosophila)	-2.49
212106_at	UBXD8	UBX domain containing 8	-2.48
225804_at	CYB5D2	cytochrome b5 domain containing 2	-2.47
223064_at	RNF181	ring finger protein 181	-2.4
219955_at	L1TD1	LINE-1 type transposase domain containing 1	-2.38
216399_s_at	SCAPER	S phase cyclin A-associated protein in the ER	-2.38
218505_at	WDR59	WD repeat domain 59	-2.37
1554140_at	WDR78	WD repeat domain 78	-2.36
229953_x_at	LCA5	Leber congenital amaurosis 5	-2.33
212146_at	PLEKHM2	pleckstrin homology domain containing, family M (with RUN domain) member 2	-2.33
238333_s_at	SPRN	shadow of prion protein homolog (zebrafish)	-2.32
1554966_a_at	FILIP1L	filamin A interacting protein 1-like	-2.29
226324_s_at	IFT172	intraflagellar transport 172 homolog (Chlamydomonas)	-2.29
222231_s_at	LRRC59	leucine rich repeat containing 59	-2.27
223376_s_at	BRI3	brain protein I3	-2.25
204710_s_at	WIPI2	WD repeat domain, phosphoinositide interacting 2	-2.25
221219_s_at	KLHDC4	kelch domain containing 4	-2.23
228557_at	L3MBTL4	l(3)mbt-like 4 (Drosophila)	-2.23
225299_at	MYO5B	myosin VB	-2.22
219428_s_at	PXMP4	peroxisomal membrane protein 4, 24kDa	-2.22
214100_x_at	NSUN5B	NOL1/NOP2/Sun domain family, member 5B	-2.21
215034_s_at	TM4SF1	transmembrane 4 L six family member 1	-2.21
1553971_a_at	GATS	opposite strand transcription unit to STAG3	-2.19
223219_s_at	CNOT10	CCR4-NOT transcription complex, subunit 10	-2.18
203259_s_at	HDDC2	HD domain containing 2	-2.18
221535_at	LSG1	large subunit GTPase 1 homolog (S. cerevisiae)	-2.18
1553569_at	OAF	OAF homolog (Drosophila)	-2.16
221542_s_at	ERLIN2	ER lipid raft associated 2	-2.15
222401_s_at	TMEM50A	transmembrane protein 50A	-2.15
213159_at	PCNX	pecanex homolog (Drosophila)	-2.13
204808_s_at	TMEM5	transmembrane protein 5	-2.13
211628_x_at	FTHP1	ferritin, heavy polypeptide pseudogene 1	-2.09
213084_x_at	hCG_16001	similar to ribosomal protein L23A	-2.09
219091_s_at	MMRN2	multimerin 2	-2.09
218072_at	COMMD9	COMM domain containing 9	-2.08
212199_at	MRFAP1L1	Morf4 family associated protein 1-like 1	-2.07
1553992_s_at	NBR2	neighbor of BRCA1 gene 2	-2.07
1558398_at	ANKRD24	ankyrin repeat domain 24	-2.06
227387_at	NSMCE4A	non-SMC element 4 homolog A (S. cerevisiae)	-2.06
231999_at	ANKRD11	ankyrin repeat domain 11	-2.05
226011_at	CCDC12	coiled-coil domain containing 12	-2.03
231050_at	HRASLS5	HRAS-like suppressor family, member 5	-2.01
215497_s_at	WDTC1	WD and tetratricopeptide repeats 1	-2
1553260_s_at	ALS2CR11	amyotrophic lateral sclerosis 2 (juvenile) chromosome region, candidate 11	3.76
238851_at	ANKRD13A	ankyrin repeat domain 13A	3.53
1570255_s_at	ANKRD20A1	ankyrin repeat domain 20 family, member A1	2.92
229906_at	ARMC7	armadillo repeat containing 7	2.47
1555369_at	BAGE	B melanoma antigen	4.03
219218_at	BAHCC1	BAH domain and coiled-coil containing 1	2.1
244738_at	BRWD3	bromodomain and WD repeat domain containing 3	2.48
1553736_at	CCDC131	coiled-coil domain containing 131	5.12
241360_at	CCDC15	coiled-coil domain containing 15	2.54
1553849_at	CCDC26	coiled-coil domain containing 26	2.38
220593_s_at	CCDC40	coiled-coil domain containing 40	3.81
238438_at	CNOT6L	CCR4-NOT transcription complex, subunit 6-like	2.67
1569293_x_at	CROCCL1	ciliary rootlet coiled-coil, rootletin-like 1	3.27
221225_at	DCAKD	dephospho-CoA kinase domain containing	2.33
242003_at	ERICH1	glutamate-rich 1	3.2
225834_at	FAM72A	family with sequence similarity 72, member A	2.56
206640_x_at	GAGE12C	G antigen 12C	2.88
1554591_at	GDEP	gene differentially expressed in prostate	2.77
224646_x_at	H19	H19, imprinted maternally expressed untranslated mRNA	2.07
233075_at	HERC2P7	hect domain and RLD 2 pseudogene 7	4.15
1564777_at	HYALP1	hyaluronoglucosaminidase pseudogene 1	3.23
215513_at	HYMAI	hydatidiform mole associated and imprinted	4.41
213610_s_at	KLHL23	kelch-like 23 (Drosophila)	2.1
220238_s_at	KLHL7	kelch-like 7 (Drosophila)	4.25
232720_at	LINGO2	leucine rich repeat and Ig domain containing 2	3.23
231781_s_at	LRRC2	leucine rich repeat containing 2	3.62
216149_at	LRRC37B2	leucine rich repeat containing 37, member B2	2.6
221612_at	LRTM1	leucine-rich repeats and transmembrane domains 1	3.24
222944_s_at	MAGIX	MAGI family member, X-linked	4.27
237842_at	MAP7D3	MAP7 domain containing 3	2.35
208210_at	MAS1	MAS1 oncogene	3.06
1561660_at	MCART6	mitochondrial carrier triple repeat 6	2.47
231529_at	MEG3	maternally expressed 3	5.01
1570052_at	MIPOL1	mirror-image polydactyly 1	2.95
239650_at	NAP5	Nck-associated protein 5	3.68
234737_at	NT5DC3	5'-nucleotidase domain containing 3	5.57
224582_s_at	NUCKS1	nuclear casein kinase and cyclin-dependent kinase substrate 1	2.39
1562591_a_at	OFCC1	orofacial cleft 1 candidate 1	2.37
232586_x_at	OR7E126P	olfactory receptor, family 7, subfamily E, member 126 pseudogene	6.55
206897_at	PAGE1	P antigen family, member 1 (prostate associated)	2.03
234529_at	PCGEM1	prostate-specific non-coding gene	3.6
235758_at	PNMA6A	paraneoplastic antigen like 6A	2.03
230784_at	PRAC	small nuclear protein PRAC	5.5
227040_at	NHLRC3	NHL repeat containing 3	3.14
227773_at	SAMD10	sterile alpha motif domain containing 10	2.3
1563849_at	SH2D4B	SH2 domain containing 4B	2.63
1567028_s_at	SH3GLP2	SH3-domain GRB2-like pseudogene 2	2.26
1553020_at	SMCR5	Smith-Magenis syndrome chromosome region, candidate 5 (non-protein coding)	4.05
231701_s_at	SMCR8	Smith-Magenis syndrome chromosome region, candidate 8	2.21
236130_at	SNORA37	small nucleolar RNA, H/ACA box 37	5.63
206318_at	SPINLW1	serine peptidase inhibitor-like, with Kunitz and WAP domains 1 (eppin)	5.92
236848_s_at	TEX13A	testis expressed 13A	3.91
214920_at	THSD7A	thrombospondin, type I, domain containing 7A	2.08
238063_at	TMEM154	transmembrane protein 154	2.55
244513_at	TMEM161B	transmembrane protein 161B	3.43
1553559_at	TMEM171	transmembrane protein 171	4.43
233480_at	TMEM43	transmembrane protein 43	2.72
244716_x_at	TMIGD2	transmembrane and immunoglobulin domain containing 2	4.98
215637_at	TSGA14	testis specific, 14	2.45
220968_s_at	TSPAN9	tetraspanin 9	2.11
231479_at	TTC33	tetratricopeptide repeat domain 33	4.56
211460_at	TTTY9A	testis-specific transcript, Y-linked 9A	2.2
232964_at	WBSCR19	Williams Beuren syndrome chromosome region 19	3.23
1562209_at	WDR21B	WD repeat domain 21B	3.18
238239_at	WDR27	WD repeat domain 27	2.07
223833_at	WDR55	WD repeat domain 55	3.63
244038_at	WDR89	WD repeat domain 89	4.79
1553640_at	XKR6	XK, Kell blood group complex subunit-related family, member 6	2.55
